1  
2  
3  
4  
5  
6  
7  
8  
9  
10  
11  
12  
13  
14  
15  
16  
17  
18  
19  
20  
21  
22  
23  
24  
25  
26  
27  
28  
29  
30  
31  
32  
33  
34  
35  
36  
37  
38  
39  
40  
41  
42  
43  
44  
45  
46  
47  
48  
49  
50  
51  
52

## **Bud13 Promotes a Type I Interferon Response by Countering Intron Retention in Irf7**

Luke S. Frankiw<sup>1,2</sup>, Devdoot Majumdar<sup>1,2</sup>, Christian Burns<sup>1</sup>, Logan Vlach<sup>1</sup>, Annie Moradian<sup>1</sup>,  
Michael J. Sweredoski<sup>1</sup>, David Baltimore<sup>1,3\*</sup>

<sup>1</sup>*Division of Biology and Biological Engineering, California Institute of Technology, Pasadena, CA 91125, USA*

<sup>2</sup>*These authors contributed equally*

<sup>3</sup>*Lead Contact*

*\*Correspondence: [baltimo@caltech.edu](mailto:baltimo@caltech.edu)*

53 **SUMMARY**

54

55 Intron retention (IR) has emerged as an important mechanism of gene expression control. Despite  
56 this, the factors that control IR events remain poorly understood. We observed consistent IR in one  
57 intron of the *Irf7* gene and identified Bud13 as an RNA-binding protein that acts at this intron to  
58 increase the amount of successful splicing. Deficiency in Bud13 led to increased IR, decreased  
59 mature *Irf7* transcript and protein levels, and consequently to a dampened type I interferon  
60 response. This impairment of *Irf7* production in Bud13-deficient cells compromised their ability to  
61 withstand VSV infection. Global analysis of Bud13 knockdown and BUD13 cross-linking to RNA  
62 revealed a subset of introns that share many characteristics with the one found in *Irf7* and are  
63 spliced in a Bud13-dependent manner. Deficiency of Bud13 led to decreased mature transcript from  
64 genes containing such introns. Thus, by acting as an antagonist to IR, Bud13 facilitates the  
65 expression of genes at which IR occurs.

66

67

68

69

70

71

72

73

74

75

76

77

78

79

80

81

82

83

84

85

86

87

88

89

90

91

92

93

94 **INTRODUCTION**

95  
110 Three forms of alternative processing of a pre-mRNA have been described: differential  
111 inclusion of an exon, alternative splice site selection, and intron retention (IR). The latter, IR, has  
112 emerged as a previously underappreciated mechanism of post-transcriptional gene regulation.  
113 Unlike the two alternative splicing events, IR rarely contributes to proteomic diversity.<sup>1</sup> However, IR  
114 events have the ability to act as negative regulators of gene expression by: (1) delaying onset of  
115 gene expression by slowing down splicing kinetics, (2) increasing potential nuclear degradation by  
116 nuclear exosomes, (3) increasing potential cytoplasmic degradation by nonsense mediated decay.<sup>2</sup>

117 Recent genomic studies suggest IR plays an important role in the regulation of gene  
118 expression in a wide range of processes including cellular differentiation<sup>3,4</sup> and tumorigenesis.<sup>5</sup>  
119 Further, widespread IR throughout mouse and human cell and tissue types has led to the idea that  
120 IR events act to functionally “tune” the transcriptome of a cell.<sup>6</sup> However, with few exceptions, the  
121 factors that control IR events and thus potentially shape gene expression programs of cells, remain  
122 poorly understood.

123 *Irf7* is an interferon-inducible master regulator of the type-I interferon-dependent immune  
124 response and is crucial to the production of interferon- $\alpha$  and  $\beta$ .<sup>7</sup> Aberrant *Irf7* production is linked to  
125 a wide range of pathologies, from life-threatening influenza<sup>8</sup> to autoimmunity<sup>9</sup>, because precise  
126 regulation of *Irf7* ensures a proper immune response. Notably, intron 4 of *Irf7* is short, GC-rich, and  
127 has a poor splice donor sequence, characteristics shared by many poorly spliced introns. We and  
128 others have previously shown that intron 4 of *Irf7* splices inefficiently<sup>10</sup>, affecting gene expression  
129 and opening a new line of inquiry as to the mechanism of IR regulation in *Irf7*.

130 Using RNA antisense purification-mass spectrometry (RAP-MS)<sup>11</sup>, we identified the protein  
131 Bud13 as one that regulates IR in *Irf7*. Bud13 was found to aid splicing efficiency and expression of  
132 the *Irf7* mature transcript and protein, thus promoting the downstream type-I interferon-dependent  
133 immune response. We show that *Irf7* is able to trigger a robust interferon response in the presence  
134 but not in the absence of Bud13. Further, Bud13 was found to increase the splicing efficiency of a  
135 multitude of other junctions with similar characteristics to the one found in *Irf7*. By aiding in splicing

136 efficiency, Bud13 limits intron retention and increases gene expression levels of transcripts  
137 containing Bud13 dependent junctions.

138

## 139 **RESULTS**

140

### 141 **Irf7 contains an intron that splices poorly following stimulation.**

142

143 To study the role of mRNA splicing during an innate immune response, we sequenced the  
144 RNA from mouse bone marrow-derived macrophages (BMDMs) stimulated with either TNF $\alpha$ , IFN $\alpha$ ,  
145 or Poly(I:C). From this sequencing, we identified an increased number of intronic reads in the fourth  
146 intron of the most abundant transcript of Irf7 (Fig. 1A). A variety of features of this intron make it a  
147 likely candidate for retention.<sup>6</sup> It is extremely small at 69 nucleotides and has a high G/C content in  
148 both the flanking exons and within the intron itself (Fig. 1B-E). Furthermore, the intron contains a  
149 'weak' 5' splice site, one that deviates significantly from a consensus splice site sequence. This is  
150 quantified using a maximum entropy model to calculate the splice site quality score (Fig. 1F).<sup>12</sup> This  
151 retention is independent of time or stimulant (Fig. 1G, H).

152 To quantify the extent of retention across RNA-seq data-sets, we use a metric we designate  
153 the "splicing ratio" (SR) (Fig. 1I; see methods), which is a length normalized ratio of intronic reads to  
154 total reads at each junction. Low SR values indicate a junction is primarily spliced whereas high SR  
155 values indicate a junction is primarily unspliced. Using this metric, we quantified the extent of  
156 retention for all junctions in the most abundant Irf7 transcript. We observed that for all types of  
157 stimulation, the retention of the fourth intron of the transcript is much greater than that seen for any  
158 of the other introns (Fig. 1J and S1A, B). This intron remains poorly spliced despite the fact that  
159 there is clear excision of neighboring introns. It is worth noting that quantitation of the IFN $\alpha$   
160 stimulation shows increased intronic signal throughout the Irf7 transcript. This increased intronic  
161 signal is due to faster and stronger induction of Irf7 via stimulation with IFN $\alpha$  and as such, an  
162 increase in the amount of pre-mRNA at a given stimulation time-point. Despite this increase in  
163 intronic signal throughout the transcript, we observed a corresponding increase in the level of

164 retention for the poorly spliced fourth intron (Fig. 1J, S1B). Thus, we conclude this intron of *Irf7*  
165 splices poorly following many forms of stimulation.

166

167 **RAP-MS identifies Bud13 as an RNA binding protein that interacts with IRF7 mRNA.**

168

169 To understand how cells handle a retained intron, we sought to identify trans-acting proteins  
170 that might affect the process using RNA Antisense Purification followed by Mass Spectrometry (RAP-  
171 MS) (Fig. 2A)<sup>11</sup>. RAP-MS employs antisense biotin-containing ssDNAs complementary to *Irf7* exons  
172 to purify the proteins associated with the total pool of *Irf7* transcripts, containing both nascent pre-  
173 mRNAs and mature mRNA. Using this proteomic approach, we identified the RNA-binding protein  
174 Bud13 to be highly enriched (~6-fold) on *Irf7* transcripts as compared to  $\beta$ -*actin* transcripts, which were  
175 used as a control (Fig. 2B). Bud13 has been characterized in yeast as a member of the Retention  
176 and Splicing complex (RES),<sup>13</sup> forming a trimeric complex with Pml1p and Snu17p, and aids in the  
177 splicing and nuclear retention of a subset of transcripts. It is not well characterized in mammalian  
178 systems. We captured a variety of other known RNA-binding proteins (Pum2, Prpf40a, Son); however,  
179 no other protein was enriched greater than two fold on *Irf7* transcripts. We observed specificity in the  
180 RNA antisense purification for the intended transcripts (Fig. 2C).

181 Following RAP-MS, we confirmed Bud13 enrichment on *Irf7* transcripts by performing RNA  
182 Immunoprecipitation (RIP) followed by qPCR. Using formaldehyde cross-linked, BMDMs stimulated  
183 with TNF $\alpha$  for 30 minutes or Poly(I:C) for 12 hours, we observed >7-fold enrichment of *Irf7* transcripts  
184 associated with Bud13 immunoprecipitates as compared to Rabbit IgG control immunoprecipitates  
185 (Fig. 2D, E). Of note, despite using two different stimuli, we find similar levels of enrichment. In  
186 contrast, no differential enrichment of Rpl32 was observed. Thus, isolating the proteins associated  
187 with *Irf7* mRNA transcripts led to the identification of Bud13, and immunoprecipitation of Bud13 protein  
188 confirmed enrichment of *Irf7* mRNA.

189

190

191

192 **Bud13 knockdown leads to increased retention in the weak *Irf7* intron.**

193

194 To determine whether the enrichment of Bud13 had an effect on *Irf7* mRNA processing, we  
195 used an shRNA approach to knockdown Bud13 protein levels in BMDMs (Fig. S2A, B). To quantify  
196 differences in splicing between the shBud13 sample and the scrambled control sample, we calculated  
197 the difference in the previously mentioned splicing ratio (SR) metric between shBud13 and control for  
198 each junction at each time point. This resulting value was designated the  $\Delta$ SR. A positive  $\Delta$ SR  
199 indicates a junction is more unspliced in the shBud13 sample while a negative  $\Delta$ SR indicates a junction  
200 is more unspliced in the control sample.

201 RNA-seq was performed on RNA from unstimulated BMDMs, as well as macrophages  
202 stimulated with TNF $\alpha$  for 0, 30, 60, and 120 minutes. Bud13 knockdown led to a further increased  
203 retention of the fourth intron in *Irf7* (Fig. 3A – highlighted intron, S2C). Further, the sequencing  
204 coverage plots showed little variation in splicing for the other seven introns in the transcript. This was  
205 confirmed when splicing was quantified using the  $\Delta$ SR metric (Fig. 3B). This splicing difference was  
206 confirmed via RT-PCR (Fig. 3C). At all stimulation time-points, the  $\Delta$ SR value for the fourth intron was  
207 significantly greater than 0, indicating an increase in retention when Bud13 levels were reduced. There  
208 is a significant difference in the  $\Delta$ SR of intron 4 as compared to every other junction in the *Irf7* transcript  
209 ( $p < 0.001$ , Student's t-test). All other pairwise comparisons are insignificant. It appears that Bud13  
210 plays a specific role of aiding in the excision of the poorly spliced junction but is not required for total  
211 splicing of other introns in the transcript, at least as indicated by the partial knockdown with an shRNA.  
212 We next looked at how this retention affected the induction kinetics of *Irf7*. We observed decreased  
213 induction of *Irf7* mRNA in response to TNF $\alpha$  stimulation in shBud13 BMDMs as compared to control  
214 BMDMs (Fig. 3D), consistent with the idea that intron retention leads to transcript degradation.<sup>14</sup> Other  
215 TNF $\alpha$  induced transcripts that lacked a Bud13 dependent splicing defect showed similar induction  
216 between the time-courses (Fig. S2 D-F).

217

218

219

220 **Bud13 knockdown alters the type I interferon response.**

221  
222 Because Irf7 is known as a ‘master regulator’ for robust type I interferon production<sup>7</sup>, we next  
223 investigated the effect of Bud13 knockdown on a type I interferon response. To do so, we stimulated  
224 BMDMs with the TLR3 agonist Poly(I:C) for up to 24 hours. Activation of TLR3 leads to the production  
225 of type I interferons followed by the downstream induction and activation of Irf7, which serves to  
226 amplify the type I interferon response via positive feedback<sup>8</sup>. We again observed differential splicing  
227 between the shBud13 samples and the control samples in intron 4 of Irf7 (Fig. 4A, S3A). As before,  
228 there is a significant difference in the  $\Delta$ SR of intron 4 as compared to every other junction in the Irf7  
229 transcript (Fig. 4B.  $p < 0.001$ , Student’s t-test), whereas all other pairwise comparisons are insignificant.  
230 As is the case with TNF $\alpha$ , knocking down Bud13 altered Irf7 induction kinetics. Less Irf7 mRNA is  
231 induced at 240, 720, and 1440mins of poly(I:C) stimulation (Fig. 4C). This reduction in Irf7 mRNA  
232 leads to a decrease in the amount of Irf7 protein produced (Fig. 4D).

233 Next we looked at how this reduction in Irf7 would alter the production of RNA from interferon  
234 signature genes (ISGs). Expression of 119 ISGs (selected based on upregulation in response to IFN $\alpha$   
235 <sup>15</sup>; see methods) was examined. In unstimulated BMDMs, used as a baseline, the median log<sub>2</sub>  
236 expression fold change (FPKM shBud13/ FPKM control) is 0.1655 (Fig. 4D). In contrast, at 720 mins  
237 of stimulation, the median log<sub>2</sub> expression fold change shifts to -0.1007 (Fig. 4E), indicating a  
238 significant decrease in ISG expression in the shBud13 sample compared to the control sample at this  
239 time-point compared to the baseline (Wilcoxon rank-sum,  $P < .001$ ). This significant decrease in ISG  
240 expression remained true when comparing any of the ‘early’ time points (0, 15, 60 mins) to any of the  
241 ‘late’ timepoints (240, 720, 1440 mins) (Fig. 4G, Wilcoxon rank-sum,  $P < 0.001$ ). qPCR was used to  
242 monitor expression of both IFN $\alpha$  and IFN $\beta$  following 720 and 1440 mins of Poly(I:C) stimulation. We  
243 observed significant reduction in both when comparing the shBud13 samples as to the control samples  
244 (Fig. 4H, I). To ensure differential expression of ISGs was not due to splicing defects from Bud13  
245 knockdown, we quantified the  $\Delta$ SR for every ISG junction at 720 mins. The fourth intron of Irf7 has  
246 the greatest  $\Delta$ SR at 0.227. Only four other junctions of the 375 that were examined have  $\Delta$ SRs greater

247 than 0.1, and the majority of junctions have  $\Delta$ SRs close to 0 (Fig. S3C; mean = 0.002, median = 0).  
248 Similar results were obtained when BMDMs were stimulated with the TLR9 agonist CpG (Figure S4).  
249 Taken together, we conclude that Bud13 deficiency results in a highly compromised type I interferon  
250 response.

251 We next examined whether *Irf7* pre-mRNA with a retained fourth intron was able to exit the  
252 nucleus and enter the cytoplasm. BMDMs were stimulated with poly(I:C) and fractionated into a  
253 nuclear fraction (containing the nucleoplasm and chromatin) and a cytoplasmic fraction. RNA-seq  
254 was performed on both fractions. In the cytoplasm, we found *Irf7* mRNA to be completely spliced (Fig.  
255 4J, K). Thus, unspliced *Irf7* is either being degraded in the nucleus, or it makes it to the cytoplasm  
256 and is degraded extremely quickly, such that virtually no signal can be detected via RNA-seq.  
257 Furthermore, in support of our whole cell sequencing data and *Irf7* immunoblots, we observed less  
258 *Irf7* mRNA in the cytoplasm in shBud13 samples as compared to control samples (Fig. 4L). In the  
259 nucleus, although we notice a large number of unspliced reads at all junctions in both samples, the  
260 fourth intron of *Irf7* again showed a specific dependency on Bud13 (Fig. 4K, S5B). Finally, the fourth  
261 intron had a greater RPKM in the nucleus in shBud13 compared to control BMDMs across the  
262 stimulation time-course (Fig. 4K) and had a significantly greater nuclear  $\Delta$ SR than any other junctions  
263 in the transcript (Fig S5B).

#### 264 **Global analysis of the role of Bud13 in BMDMs.**

265 We next investigated global splicing differences caused by Bud13 knockdown. Using the  
266 TNF $\alpha$  stimulated data-set,  $\Delta$ SR was calculated for every junction in every expressed gene. We  
267 found that a number of other transcripts had a Bud13 dependent junction (Fig. 5A). Of note, the  
268 fourth intron of *Irf7* is among the most Bud13 dependent junctions in both the TNF $\alpha$  and Poly(I:C)  
269 data-sets (Fig. 5A., Fig. S6H, see methods for analysis details). Similar to the case with *Irf7*, almost  
270 all transcripts contain only a single Bud13 dependent junction, even when low thresholds are used to  
271 quantify dependency (Fig. 5B). To determine whether splicing differences caused by Bud13  
272 knockdown led to altered gene expression, we compared the effect of the Bud13 knockdown on



273 genes that contained a Bud13 dependent junction to those that did not. (see methods). The median  
274  $\log_2$  expression fold change (FPKM shBud13/ FPKM control) for genes containing a Bud13  
275 dependent junction was -0.5084. In contrast, the median  $\log_2$  expression fold change (FPKM  
276 shBud13/ FPKM control) for genes without any junctions affected by Bud13 knockdown was -0.2170.  
277 Thus, we conclude there is an inverse relationship between IR due to Bud13 knockdown and gene  
278 expression (Wilcoxon rank-sum,  $P < .01$ ) (Fig. 5C).

279 Next, it was of interest to us to identify sequence elements that led Bud13 to have its specific  
280 splicing effect. The most evident element to explore was the effect of splice site strength on Bud13-  
281 dependent splicing. Previous work has shown that the yeast orthologue of Bud13 plays a role in  
282 efficient splicing for a junction with a weak 5' splice site<sup>13</sup>. Further, the junction affected in *lrf7* has a  
283 non-consensus 5' splice site. To investigate this issue, we first quantified every 5' and 3' splice site  
284 using a maximum entropy model.<sup>12</sup> Then, we took progressively weaker splice site thresholds, and  
285 compared the mean  $\Delta$ SR for every junction below that threshold to the mean  $\Delta$ SR of every junction in  
286 the data-set (Fig. 5D). We saw that as the splice site threshold for the 5' splice site became  
287 progressively weaker, the mean  $\Delta$ SR for junctions weaker than that threshold increased and thus  
288 there was a greater Bud13 splicing effect. This result was not seen when the same analysis was  
289 applied to the 3' splice site. In support of a 5' splice site dependency for a Bud13 effect, we noticed  
290 differences in the 5' splice site motif of Bud13 dependent junctions as compared to to all expressed  
291 junctions (Fig. 5E).

292 We then analyzed the Bud13 splicing effect with respect to other features known to correlate  
293 with IR.<sup>6</sup> Across all time-points for both TNF $\alpha$  (Fig. 5F-H) and Poly(I:C) (Fig. S7 A-C), Bud13  
294 dependent introns were dramatically smaller and had increased G/C content in both the intron and in  
295 the flanking exons. We also noticed that the distance from the branch point to the 3' splice site was  
296 smaller in the Bud13 dependent introns than in the total data-set (Fig. 5I, Fig. S7D). This could be a  
297 byproduct of the smaller intron length; however, it is of interest because Bud13 has been shown in  
298 yeast to bind just downstream of the branch point.<sup>16</sup> A significant difference was not seen in branch  
299 point strength and Bud13 splicing effect (Fig. S7 E, F). As IR is only one form of alternative splicing,

300 we also looked at whether other forms of alternative splicing were affected by Bud13 knockdown. We  
301 found that the most statistically significant number of alternative splicing events were IR events (Fig.  
302 S7G, see methods). There were three-times as many IR events as the next most alternative splicing  
303 event. IR at intron 4 in *Irf7* was the only alternative splicing event that occurred in transcripts related  
304 to the type I interferon response.

### 305 **eCLIP shows enrichment on Bud13 dependent junctions near the 3' splice site.**

306 Next we used enhanced crosslinking and immunoprecipitation (eCLIP)-seq data from the  
307 ENCODE Project Consortium<sup>17</sup> to investigate Bud13 binding specificity across the genome. We  
308 found that in K562 and Hep G2 cells, the majority of Bud13 eCLIP-sequencing reads were located  
309 downstream of the branchpoint near the 3' splice site (Fig. 6A, B), consistent with what is seen in  
310 yeast.<sup>16</sup> Plots are shown as a measure of binding over input. There is some read density near the  
311 5' splice site, which we hypothesize is due to Bud13's association with the spliceosome. Although it  
312 may not bind near the 5' splice site, factors in the spliceosome that interact with Bud13 may  
313 immunoprecipitate with Bud13, leading to 5' signal. Data for *Sf3b4* and *Prpf8*, known RBPs that  
314 interact with the 3' and 5' splice site respectively, is also shown for comparison (Fig. 6A, B). We  
315 hypothesized that Bud13 binding would correlate with Bud13 activity. To test this hypothesis, we  
316 used knockdown data from the ENCODE Project Consortium to determine Bud13 dependent  
317 junctions in K562 and Hep G2 cells. In K562 cells, we noticed that there was a significant increase  
318 in Bud13 binding over input at Bud13 dependent junctions (Fig. 6A). In Hep G2 cells, this increase  
319 was less pronounced (Fig. 6B), however, we note that we found Bud13 knockdown had a much  
320 greater impact in K562 cells as compared to Hep G2 cells (Fig. S8A). In order to survey a large  
321 enough selection of junctions in Hep G2's, we had to significantly lower our threshold for what was  
322 deemed a Bud13 dependent junction (see methods), which in turn might explain the dampened  
323 Bud13 binding/activity relationship in Hep G2. We conclude that Bud13 either preferentially  
324 associates with these Bud13 dependent junctions or associates with them for a longer period of  
325 time,.

326 We next performed peak calling to determine the location of significant peaks. We find the  
327 majority of peaks are in intronic regions or intron-exon junctions and that most of the peaks that lie in  
328 intron-exon junction are located at the 3' junction (Fig. 6C, D). As might be expected from  
329 knockdown data, when comparing introns that have an overlapping eCLIP peak to all introns from  
330 expressed transcripts, we see both a length and G/C% bias (Fig. 6E, F). Bud13 peaks tend to fall in  
331 smaller introns that are GC rich, a finding consistent with the  $\Delta$ SR data. Lastly, a list of the GO  
332 biological processes most enriched from the list of peaks in K562 and Hep G2 cells is shown (Fig.  
333 6G).

334

### 335 **Bud13 knockdown alters the BMDM response to VSV.**

336 Vesicular stomatitis virus (VSV) is a (-)ssRNA virus known to induce type I IFN through  
337 TLR7<sup>18</sup>. To test whether impairment of Irf7 due to Bud13 knockdown was present in VSV stimulated  
338 BMDMs, we infected both shBud13 and control BMDMs at an MOI of 5 and 10. At all time-points  
339 throughout infection in both MOIs, there was dampened Irf7 induction (Fig. 7A, B) as quantified by  
340 Taqman qPCR. Next, in order to determine the consequences of impaired Irf7 induction, we  
341 determined the yield of virus from BMDMs following a period of infection with a given input MOI.  
342 shBud13 BMDMs produce significantly more VSV as compared to control BMDMs (Fig. 7C). This  
343 difference in viral production is presumably due to decreased production of Irf7 and the  
344 corresponding dampened type I interferon response. To test if a mechanism other than Irf7 intron  
345 retention may contribute to the impaired response to viral infection, we rescued Irf7 levels by  
346 expressing Irf7 cDNA either in the context of the Bud13 knockdown or the control. We found  
347 overexpression of Irf7 cDNA effectively rescues the ability for a cell to clear virus (Fig. 7C). As such,  
348 we conclude that the viral susceptibility associated with Bud13 knockdown is due to the increased  
349 intron retention in the fourth intron of Irf7 and the corresponding dampened type I interferon  
350 response.

351

352

353

354 **DISCUSSION**

355  
356 In this study, we sought proteins that might relate to the poor splicing of an intron in *Irf7*  
357 transcripts. Using RAP-MS, we identified Bud13 as a protein that has the ability to increase splicing  
358 of the *Irf7* intron. In the absence of *Bud13*, in response to inflammatory stimulus, macrophages  
359 produced *Irf7* with increased intron retention (IR) and notably less mature *Irf7* transcript and protein  
360 (Fig. 3C, 4C, 4D, S4C). *Irf7* is the interferon-inducible master regulator of the type-I interferon-  
361 dependent immune response.<sup>7</sup> Correspondingly, depletion of Bud13 led to a general reduction in  
362 ISG and cytokine production, implying a compromised type I interferon response (Fig. 4E-J, S4D-G).  
363 This splicing and corresponding expression defect upon Bud13 depletion was observed under  
364 various stimulation regimens and times. We found that macrophages deficient for Bud13 were  
365 strikingly more susceptible to infection by VSV, presumably owing to the reduction in *Irf7* transcript  
366 levels (Fig. 7).

367 We observed the Bud13 splicing dependence in other introns of other genes. A number of  
368 short, GC-rich introns with non-consensus splice donor sites were excised inefficiently when Bud13  
369 levels were depleted (Fig. 5). As was the case with *Irf7*, this increased IR reduced mature transcript  
370 levels (Fig. 5A). Transcripts containing retained introns have been shown in the literature to be  
371 degraded by two mechanisms: (1) nuclear degradation via the RNA exosome, (2) cytoplasmic  
372 degradation upon detection of a pre-termination codon (PTC) via the NMD decay machinery.  
373 Although the majority of these introns contain a PTC, it remains to be determined whether  
374 degradation is occurring in the nucleus or cytoplasm.<sup>14,19</sup>

375 Bud13 was originally identified as a part of a “Retention and Splicing” (RES) complex<sup>13</sup> in  
376 yeast. However, yeast Bud13 (ScBud13) and mammalian Bud13 are significantly different lengths  
377 (266 vs. 637 amino acids)<sup>20</sup>, with only the mammalian protein containing a large, disordered  
378 arginine-rich N-terminal domain. ScBud13 counteracts IR in introns within the mediator complex,  
379 mating genes, and tRNA modifying genes<sup>21–23</sup>, which in turn impair yeast budding. In connection  
380 with the RES complex, ScBud13 is thought to safeguard formation of the ‘B<sup>act</sup> complex’ of the  
381 spliceosome.<sup>24</sup> In the B<sup>act</sup> stage, the 5' splice donor and branch point are recognized by the

382 spliceosome. However, progression to catalysis of the first step of the splicing reaction requires  
383 remodeling of several spliceosome components.<sup>25</sup> Lack of the RES complex has been shown to lead  
384 to premature binding of Prp2, a quality control factor that is responsible for spliceosome remodeling  
385 as well as the disassembly of suboptimal substrates. It has been hypothesized that ScBud13 and  
386 the RES complex temporally regulate Prp2 binding.<sup>24</sup> In the mammalian context, short, GC-rich  
387 introns with weak donor sites may be particularly susceptible to Prp2-mediated disassembly, which  
388 may explain the specificity of IR events upon Bud13 depletion.

389 In yeast, differential studies using mass spectrometry<sup>26</sup> and cross-linking have established  
390 that some ScBud13 is detectable in preparations of stalled B, B<sup>act</sup>, and B\* complexes. One cryo-EM  
391 structure of the yeast spliceosome found density corresponding to ScBud13 in a stalled B<sup>act</sup> pre-  
392 catalytic complex, although a structure of the stalled B complex found only weak density for  
393 ScBud13.<sup>21,27</sup> In mammals, structural evidence of Bud13 is limited. Given the partial sequence  
394 homology between all members of the yeast RES complex and their mammalian counterparts, it is  
395 not surprising that Bud13 (and other RES complex members) are often undetectable in preparations  
396 of stalled spliceosomes using cross-linking and mass-spectrometry. Furthermore, Bud13 was not  
397 detected in a recent human cryo-EM structure of a stalled B complex.<sup>28</sup> Taken together, it is not yet  
398 possible to determine if the sub-stoichiometric nature of Bud13 in mammalian spliceosome  
399 complexes is because it is constitutively associated but highly transient or because it serves as a  
400 non-essential accessory to spliceosome function. Cryo-EM studies, as well as single molecule  
401 studies, would seem to suggest compositional heterogeneity of the spliceosome, and that the  
402 Bud13-endowed spliceosome may catalyze the splicing reaction in a fundamentally different way  
403 than is used in its absence.<sup>24,29,30</sup>

404 Recently, the RES complex in zebrafish was shown to regulate levels of IR in short, GC-rich  
405 introns in knockout studies.<sup>31</sup> Indeed, both in Zebrafish<sup>31</sup> and *C. Elegans*,<sup>32</sup> deficiency of RES  
406 components has been reported to lead to embryonic lethality. Our results show that mammalian  
407 Bud13 shares this splicing fidelity function, and deficiency may prevent proper development. Despite  
408 this, knockdown and knock-out cell lines have displayed no overt growth defects, suggesting a

409 developmental but not immune-cell intrinsic dependence on Bud13 for survival. Of note, we did  
410 sequence knockdowns of the other RES components, Rbmx2 and Snip1 (Fig. S11). We see a very  
411 mild effect on the fourth intron of *Irf7*, and although the fourth intron is the most affected in both  
412 cases as measured by  $\Delta$ SR, it lacks statistical significance when compared to other introns in the  
413 transcript. Further, we find very mild global IR when compared to the IR induced by Bud13  
414 knockdown. We do not believe our data disputes what is shown in other organisms, but instead feel  
415 that either more efficient knockdowns or a total knockout would be needed to replicate the strong  
416 effect seen with Bud13 depletion.

417         With respect to *Irf7*, the fact that a crucial immunological gene has such an intron, with its  
418 variety of seemingly negative characteristics that make it difficult for the spliceosome to excise, begs  
419 the question as to why it exists. At the heart of an inflammatory response is a tightly regulated gene  
420 expression program. Regulation of this gene expression program is crucial as small changes can  
421 shift the balance away from protective immunity towards either nonexistent or destructive  
422 immunity.<sup>33</sup> Here we've shown that alterations to the splicing efficiency of the fourth intron have the  
423 ability to significantly alter the functional output of *Irf7*. Thus, by existing in the *Irf7* transcript and  
424 commonly being retained, it stands to reason the weak fourth intron acts to dampen *Irf7* output,  
425 perhaps as a means to mitigate what otherwise would be an unchecked or inappropriately scaled  
426 response. Whether a cell actively controls this splicing event and thus, the intron serves as a  
427 regulatory control point, remains unknown. Further, it remains unknown whether Bud13 plays a role  
428 in this regulation or whether it simply represents a mechanism that evolved to counter intron  
429 retention in a subset of introns that require splicing but happen to be inherently weak.

430         In summary, we found that Bud13 modulates gene expression through its ability to alter IR,  
431 often in notably small, GC-rich introns with weak splice sites. Deficiency of Bud13 results in IR and  
432 concomitant decreased gene expression in transcripts such as *Irf7*, dampening the type I interferon  
433 response and increasing viral susceptibility. Therefore Bud13, in mediating *Irf7* gene expression,  
434 presents a potential therapeutic target for the treatment of infections or autoimmune conditions.  
435 Future studies should seek to understand why Bud13 is vital for the efficient splicing of only a subset

436 of junctions and whether or not this junction specificity plays an active role in regulating gene  
437 expression. If modulated, this strategy by which components associated with the spliceosome  
438 rescue transcripts from intron retention and degradation may represent a previously  
439 underappreciated layer of regulation in many gene expression programs.

440

#### 441 **ACKNOWLEDGEMENTS**

442

443 The authors would like to thank Mario Blanco and Mitchell Guttman (Dept. of Biology, Caltech) for  
444 assistance with eCLIP analysis; Patricia Turpin, Mati Mann, Guideng Li, and Alok Joglekar (Dept. of  
445 Biology, California Institute of Technology) for experimental and computational assistance.  
446 Additionally, the authors would like to thank Genhong Cheng (Department of Microbiology,  
447 Immunology & Molecular Genetics, UCLA) for VSV and Jae Jung (Department of Molecular  
448 Microbiology & Immunology, USC) for VSV-GFP. This work was funded from a grant from NIH  
449 (5R21AI126344) and from an endowment provided by the Raymond and Beverly Sackler  
450 Foundation.

451

#### 452 **AUTHOR CONTRIBUTIONS**

453

454 L.S.F, D.M., and D.B., conceived and designed experiments. L.S.F. conducted experiments. C.B.  
455 helped develop RAP-MS and knockdown experiments. L.S.F. and D.M. analyzed sequencing data.  
456 A.M. oversaw mass spectrometry and M.J.S. performed mass spectrometry analysis. L.S.F, D.M.,  
457 and D.B wrote the manuscript with input from all authors.

458

459

460

461

462

463

464

465

466

467

468

469

470

471

472 **References:**

- 473
- 474 1. Schmitz, U. *et al.* Intron retention enhances gene regulatory complexity in vertebrates.
- 475 *Genome Biol.* **18**, 216 (2017).
- 476 2. Wong, J. J.-L., Au, A. Y., Ritchie, W. & Rasko, J. E. Intron retention in mRNA: No longer
- 477 nonsense. *Bioessays* **38**, 41–49 (2016).
- 478 3. Wong, J. J.-L. *et al.* Orchestrated intron retention regulates normal granulocyte
- 479 differentiation. *Cell* **154**, 583–595 (2013).
- 480 4. Yap, K., Lim, Z. Q., Khandelia, P., Friedman, B. & Makeyev, E. V. Coordinated regulation
- 481 of neuronal mRNA steady-state levels through developmentally controlled intron retention.
- 482 *Genes Dev.* **26**, 1209–1223 (2012).
- 483 5. Dvinge, H. & Bradley, R. K. Widespread intron retention diversifies most cancer
- 484 transcriptomes. *Genome Med.* **7**, 45 (2015).
- 485 6. Braunschweig, U. *et al.* Widespread intron retention in mammals functionally tunes
- 486 transcriptomes. *Genome Res.* **24**, 1774–1786 (2014).
- 487 7. Honda, K. *et al.* IRF-7 is the master regulator of type-I interferon-dependent immune
- 488 responses. *Nature* **434**, 772–777 (2005).
- 489 8. Ciancanelli, M. J. *et al.* Life-threatening influenza and impaired interferon amplification in
- 490 human IRF7 deficiency. *Science* **348**, 448–453 (2015).
- 491 9. Harley, J. B. *et al.* Genome-wide association scan in women with systemic lupus
- 492 erythematosus identifies susceptibility variants in ITGAM, PXXK, KIAA1542 and other loci.
- 493 *Nat. Genet.* **40**, 204 (2008).
- 494 10. Shalek, A. K. *et al.* Single-cell transcriptomics reveals bimodality in expression and splicing
- 495 in immune cells. *Nature* **498**, 236 (2013).



- 496 11. McHugh, C. A. *et al.* The Xist lncRNA interacts directly with SHARP to silence  
497 transcription through HDAC3. *Nature* **521**, 232–236 (2015).
- 498 12. Yeo, G. & Burge, C. B. Maximum entropy modeling of short sequence motifs with  
499 applications to RNA splicing signals. *J. Comput. Biol.* **11**, 377–394 (2004).
- 500 13. Dziembowski, A. *et al.* Proteomic analysis identifies a new complex required for nuclear  
501 pre-mRNA retention and splicing. *EMBO J.* **23**, 4847–4856 (2004).
- 502 14. Jacob, A. G. & Smith, C. W. Intron retention as a component of regulated gene expression  
503 programs. *Hum. Genet.* 1–15 (2017).
- 504 15. Mostafavi, S. *et al.* Parsing the interferon transcriptional network and its disease  
505 associations. *Cell* **164**, 564–578 (2016).
- 506 16. Schneider, C. *et al.* Dynamic Contacts of U2, RES, Cwc25, Prp8 and Prp45 Proteins with the  
507 Pre-mRNA Branch-Site and 3' Splice Site during Catalytic Activation and Step 1 Catalysis  
508 in Yeast Spliceosomes. *PLOS Genet.* **11**, e1005539 (2015).
- 509 17. Consortium, E. P. An integrated encyclopedia of DNA elements in the human genome.  
510 *Nature* **489**, 57–74 (2012).
- 511 18. Lund, J. M. *et al.* Recognition of single-stranded RNA viruses by Toll-like receptor 7. *Proc.*  
512 *Natl. Acad. Sci. U. S. A.* **101**, 5598–5603 (2004).
- 513 19. Sayani, S. & Chanfreau, G. F. Sequential RNA degradation pathways provide a fail-safe  
514 mechanism to limit the accumulation of unspliced transcripts in *Saccharomyces cerevisiae*.  
515 *Rna* **18**, 1563–1572 (2012).
- 516 20. Na, I., Meng, F., Kurgan, L. & Uversky, V. N. Autophagy-related intrinsically disordered  
517 proteins in intra-nuclear compartments. *Mol. Biosyst.* **12**, 2798–2817 (2016).

- 518 21. Zhou, Y. & Johansson, M. J. The pre-mRNA retention and splicing complex controls  
519 expression of the Mediator subunit Med20. *RNA Biol.* 1–7 (2017).
- 520 22. Zhou, Y., Chen, C. & Johansson, M. J. The pre-mRNA retention and splicing complex  
521 controls tRNA maturation by promoting TAN1 expression. *Nucleic Acids Res.* **41**, 5669–  
522 5678 (2013).
- 523 23. Ni, L. & Snyder, M. A Genomic Study of the Bipolar Bud Site Selection Pattern  
524 in *Saccharomyces cerevisiae*. *Mol. Biol. Cell* **12**, 2147–2170 (2001).
- 525 24. Bao, P., Will, C. L., Urlaub, H., Boon, K.-L. & Lührmann, R. The RES complex is required  
526 for efficient transformation of the precatalytic B spliceosome into an activated Bact complex.  
527 *Genes Dev.* (2018).
- 528 25. Ohrt, T. *et al.* Prp2-mediated protein rearrangements at the catalytic core of the spliceosome  
529 as revealed by dcFCCS. *RNA* **18**, 1244–1256 (2012).
- 530 26. Fabrizio, P. *et al.* The evolutionarily conserved core design of the catalytic activation step of  
531 the yeast spliceosome. *Mol. Cell* **36**, 593–608 (2009).
- 532 27. Plaschka, C., Lin, P.-C. & Nagai, K. Structure of a pre-catalytic spliceosome. *Nature* **546**,  
533 617 (2017).
- 534 28. Bertram, K. *et al.* Cryo-EM structure of a pre-catalytic human spliceosome primed for  
535 activation. *Cell* **170**, 701–713 (2017).
- 536 29. Blanco, M. R. *et al.* Single Molecule Cluster Analysis dissects splicing pathway  
537 conformational dynamics. *Nat. Methods* **12**, 1077 (2015).
- 538 30. Hoskins, A. A. & Moore, M. J. The spliceosome: a flexible, reversible macromolecular  
539 machine. *Trends Biochem. Sci.* **37**, 179–188 (2012).

- 540 31. Fernandez, J. P. *et al.* RES complex is associated with intron definition and required for  
541 zebrafish early embryogenesis. *PLoS Genet.* **14**, e1007473 (2018).
- 542 32. Jiang, M. *et al.* Genome-wide analysis of developmental and sex-regulated gene expression  
543 profiles in *Caenorhabditis elegans*. *Proc. Natl. Acad. Sci.* **98**, 218–223 (2001).
- 544 33. Kontoyiannis, D., Pasparakis, M., Pizarro, T. T., Cominelli, F. & Kollias, G. Impaired on/off  
545 regulation of TNF biosynthesis in mice lacking TNF AU-rich elements: implications for joint  
546 and gut-associated immunopathologies. *Immunity* **10**, 387–398 (1999).
- 547 34. Liu, J. M., Sweredoski, M. J. & Hess, S. Improved 6-Plex Tandem Mass Tags Quantification  
548 Throughput Using a Linear Ion Trap–High-Energy Collision Induced Dissociation MS3  
549 Scan. *Anal. Chem.* **88**, 7471–7475 (2016).
- 550 35. Kim, D. *et al.* TopHat2: accurate alignment of transcriptomes in the presence of insertions,  
551 deletions and gene fusions. *Genome Biol.* **14**, R36 (2013).
- 552 36. Trapnell, C. *et al.* Transcript assembly and quantification by RNA-Seq reveals unannotated  
553 transcripts and isoform switching during cell differentiation. *Nat. Biotechnol.* **28**, 511–515  
554 (2010).
- 555 37. Anders, S., Pyl, P. T. & Huber, W. HTSeq—a Python framework to work with high-  
556 throughput sequencing data. *Bioinformatics* **31**, 166–169 (2015).
- 557 38. Shen, S. *et al.* rMATS: robust and flexible detection of differential alternative splicing from  
558 replicate RNA-Seq data. *Proc. Natl. Acad. Sci.* **111**, E5593–E5601 (2014).
- 559 39. Corvelo, A., Hallegger, M., Smith, C. W. & Eyras, E. Genome-wide association between  
560 branch point properties and alternative splicing. *PLoS Comput. Biol.* **6**, e1001016 (2010).
- 561 40. Van Nostrand, E. L. *et al.* Robust transcriptome-wide discovery of RNA-binding protein  
562 binding sites with enhanced CLIP (eCLIP). *Nat. Methods* **13**, 508–514 (2016).

- 563 41. Shen, L., Shao, N., Liu, X. & Nestler, E. ngs. plot: Quick mining and visualization of next-  
564 generation sequencing data by integrating genomic databases. *BMC Genomics* **15**, 284  
565 (2014).
- 566 42. Lovci, M. T. *et al.* Rbfox proteins regulate alternative mRNA splicing through evolutionarily  
567 conserved RNA bridges. *Nat. Struct. Mol. Biol.* **20**, 1434–1442 (2013).
- 568 43. Budak, G., Srivastava, R. & Janga, S. C. Seten: a tool for systematic identification and  
569 comparison of processes, phenotypes, and diseases associated with RNA-binding proteins  
570 from condition-specific CLIP-seq profiles. *RNA* **23**, 836–846 (2017).

571

572

573

574

575

576

577

578

579

580

581

582

583

584

585

586

587

588

## 589 FIGURE LEGENDS

590 **Figure 1: *Irf7* contains a weak intron that is following many forms of stimulation.** (A) Histogram of  
591 mapped reads corresponding to the TNF $\alpha$ -induced expression of *Irf7*. The poorly spliced fourth intron is  
592 highlighted. For all read density plots, reads are histogrammed in log<sub>10</sub> scale and normalized to the  
593 maximum value across the stimulation. (B) Comparison of *Irf7* splice donor and acceptor sites in mice,  
594 rats, and humans. (C-F) Histogram representing the intron length (C), intron GC content (D), flanking  
595 exon GC content (E), or 5' splice site strength of introns of expressed in BMDMs. Red represents  
596 location of *Irf7* intron 4 (C, D, F) or upstream exon (E). Black line represents downstream exon (E). (G, H)  
597 Histogram of mapped reads corresponding to the IFN $\alpha$  (G) and poly(I:C) (H) induced expression of *Irf7*  
598 focused on the slow splicing fourth intron. (I) Outline of Splicing Ratio (SR) metric. (J) Splicing ratio for all  
599 introns in *Irf7* plotted against time stimulated with TNF $\alpha$ .

600  
601 **Figure 2: RAP-MS and RIP identifies Bud13 as an RNA binding protein that interacts with IRF7**  
602 **mRNA.** (A) Outline of the RAP-MS procedure used to identify RNA-binding proteins on transcripts of  
603 interest. (B) TMT ratio (*Irf7*/Actb) for proteins identified as enriched on either *Irf7* (TMT ratio >1) or Actb  
604 (TMT ratio <1) transcripts. (C) RT-qPCR analysis of transcripts captured via RAP for *Irf7* (blue) and Actb  
605 (gold) probes. (D) RIP followed by RT-qPCR for *Irf7* and Rpl32 in TNF $\alpha$  stimulated BMDMs. Shown is  
606 the relative enrichment of transcripts captured in Bud13 RIP as compared to Rabbit IgG RIP. (E) Same as  
607 (d) except stimulation with poly(I:C). Data are representative of two independent experiments ((C-E),  
608 mean + SEM). \*P < 0.05, \*\*P < 0.01 and \*\*\*P < 0.001 (t-test).

609  
610 **Figure 3: Bud13 knockdown leads to increased retention in the poorly splicing intron of *Irf7*.** (A)  
611 Histogram of mapped reads corresponding to the TNF $\alpha$ -induced expression of *Irf7*. The poorly spliced  
612 fourth intron is highlighted. shBud13 samples are shown in green. Control samples are shown in grey.  
613 (B)  $\Delta$ SRs calculated for each junction in the *Irf7* transcript. The  $\Delta$ SR of intron 4 as compared to all other  
614 junctions is significant (Student's t-test, p<0.001). No other pairwise comparison is significant. (C)  
615 Splicing gel from RNA extracted from BMDMs stimulated for 30 mins. TNF $\alpha$  (top). Quantification of  
616 splicing gel (bottom). (D) *Irf7* FPKM fold change with respect to time stimulated. shBud13 is shown in  
617 green, control is shown in grey. Data is representative of two independent experiments (C) and is  
618 represented as mean + SEM. \* denotes p < 0.05, \*\* denotes p < 0.01, and \*\*\* denotes p < 0.001 using a  
619 Student's t test.

620 **Figure 4: Bud13 knockdown alters the type I interferon response.** (A) Histogram of mapped reads  
621 corresponding to the TNF $\alpha$ -induced expression of *Irf7*. The poorly spliced fourth intron is highlighted.  
622 shBud13 samples are shown in blue. Control samples are shown in grey. (B)  $\Delta$ SRs calculated for each  
623 junction in the *Irf7* transcript. The  $\Delta$ SR of intron 4 as compared to all other junctions is significant  
624 (Student's t-test, p<0.001). No other pairwise comparison is significant. (C) *Irf7* FPKM fold change with  
625 respect to time stimulated. shBud13 is shown in blue, control is shown in grey. (D) Immunoblot analysis  
626 of *Irf7* protein following 720 mins. poly(I:C) stimulation (left). Quantification relative to ActB (right). (E)  
627 Log<sub>2</sub> expression fold change (shBud13/control) for 119 ISGs in unstimulated BMDMs (median = 0.1655).  
628 (F) As in (E) for stimulated BMDMs (720 mins poly(I:C) (median = -0.1007). Wilcoxon rank-sum between  
629 (E) and (F), P< .001. (G) Median log<sub>2</sub> expression fold change (shBud13/control) for ISGs in unstimulated  
630 BMDMs, and BMDMs stimulated with Poly(I:C) 15, 60, 240, 720, and 1440 mins. Bars represent 95% CI.  
631 (Wilcoxon rank-sum, P< .001, for any of the 'early' time-points (0, 15, 60 mins) compared to any of the  
632 'late' time-points (240, 720, 1440 mins). (H) RT-qPCR analysis of IFN $\alpha$  mRNA levels in unstimulated  
633 BMDMs and BMDMs stimulated with poly(I:C) for 720 mins and 1440 mins. (I) Same as (H) for IFN $\beta$ . (J)  
634 Nuclear fraction (top) and cytoplasmic fraction (bottom) histograms of mapped reads corresponding to the  
635 poly(I:C)-induced expression of *Irf7* (720 mins). The poorly spliced fourth intron is highlighted. shBud13  
636 samples are shown in blue. Control samples are shown in grey. Nuclear  $\Delta$ SR = 0.35. (K) Nuclear and  
637 cytoplasmic RPKM for *Irf7* intron 4 from fractionated BMDMs stimulated with poly(I:C). (L) Cytoplasmic  
638 *Irf7* FPKM for control (grey) and shBud13 BMDMs stimulated with poly(I:C). Data is representative of four  
639 independent experiments (H, I) and is represented as mean + SEM. \* denotes p < 0.05, \*\* denotes p <  
640 0.01, and \*\*\* denotes p < 0.001 using a Student's t test. Results are presented relative to those of Rpl32  
641 (H,I).

642 **Figure 5: Global analysis of the role of Bud13.** (A) Ranked bar chart showing genes with a junction most  
643 affected by Bud13 knock-down in all samples during TNF $\alpha$  stimulation. See S7 for histograms relating to  
644 most affected junctions. (B) Grouped bar chart depicting the number of genes that have a single Bud13  
645 affected junction vs. multiple Bud13 affected junctions using three different  $\Delta$ SR thresholds. (C)  
646 Transcripts were classified as 'Bud13 dependent' if they had a junction with a  $\Delta$ SR. >0.15. The log<sub>2</sub>  
647 expression fold change (FPKM shBud13/ FPKM control) for each gene represented by the transcripts in  
648 the 'Bud13 dependent' category as well as all other genes is shown. Median 'increased IR' = -0.5084.  
649 Median 'decreased IR' = -0.2170. (Wilcoxon rank-sum,  $P < .01$ ). (D) Mean  $\Delta$ SR. for junctions below the  
650 indicated threshold (x-axis) vs. mean  $\Delta$ SR. for all junctions. Threshold applied for the 5' splice site (blue)  
651 and the 3' splice site (green). (E) 5'SS motif for all expressed junctions as compared to junctions that show  
652 retention upon Bud13 knockdown ( $\Delta$ SR. > 0.15). (F) Size of intron for introns retained upon Bud13  
653 knockdown ( $\Delta$ SR. > 0.15) (blue), in introns located in the same transcript as those affected by Bud13  
654 (green), and in introns from all expressed transcripts (orange). (G) Same as (F) for GC content. (H)  
655 Flanking exon GC content for exons that flank introns retained upon Bud13 knockdown ( $\Delta$ SR. > 0.15)  
656 (dark green) as compared to exons that flank introns from all expressed transcripts (light green). (I)  
657 Distance from the branch point to the 3' splice site for introns retained upon Bud13 knockdown ( $\Delta$ SR. >  
658 0.15) (dark blue) as compared to introns from all expressed transcripts (light blue). (F-I) data from BMDM  
659 TNF $\alpha$  stimulation. Box plots show median (center line), interquartile range (box) and tenth and ninetieth  
660 percentiles. \* $P < 0.05$ , \*\* $P < 0.01$  and \*\*\* $P < 0.001$  (Mann-Whitney *U*-test).

661 **Figure 6: Bud13 interacts primarily near the 3' splice site of small, GC rich introns.** (A) eCLIP-seq  
662 read density plots in K562 cells. Bud13 density plot over all expressed junctions shown in blue (top),  
663 Bud13 density plot over Bud13 dependent junctions shown in red (top). Sf3b4 density plot over all  
664 expressed junctions shown in maroon (middle), and Prpf8 density plot over all expressed junctions is  
665 shown in green (bottom). (B) Same as in (A) but for Hep G2 cells. (C) Bud13 eCLIP-seq peak  
666 distribution. Peaks fell within either intronic regions, intron-exon junctions, or exonic regions. Peaks that  
667 fell within intron-exon junction were further classified as 5' junction peaks or 3' junction peaks (bottom).  
668 (D) Same as (C) but for Hep G2. (E) Size of all introns in expressed transcripts for the given cell line  
669 (dark blue) vs size of introns with overlapping eCLIP peak (maroon). Shown in K562 (left) and Hep G2  
670 (right) cells. Box plots show median (center line), interquartile range (box) and tenth and ninetieth  
671 percentiles (whiskers). \* $P < 0.05$ , \*\* $P < 0.01$  and \*\*\* $P < 0.001$  (Mann-Whitney *U*-test). (F) Same as (E)  
672 for GC content. (G) GO terms (biological process) enriched among Bud13 eCLIP peaks in K562(dark  
673 blue) and Hep G2 (maroon) cells.

674 **Figure 7: Bud13 knockdown alters the BMDM response to VSV.** (A) RT-qPCR analysis of Irf7 mRNA  
675 levels in infected control or shBud13 BMDMs stimulated with VSV (MOI 5) across 24 hours. (B) Same as  
676 in (A) except stimulated at an MOI of 10. Results are presented relative to those of Rpl32. (C) PFU/mL for  
677 viral supernatant from infected shBud13 (blue), control (red), shBud13 with Irf7 overexpression (yellow), or  
678 control with Irf7 overexpression (maroon) BMDMs. Data is representative of two (A, B) or three  
679 independent experiments (C) and is shown as mean + SEM. \* denotes  $p < 0.05$ , \*\* denotes  $p < 0.01$ , and  
680 \*\*\* denotes  $p < 0.001$  using a Student's *t* test

681  
682  
683  
684  
685  
686  
687  
688  
689  
690  
691  
692  
693  
694  
695

## STAR METHODS



696

## 697 **Contact for Reagent and Resource Sharing**

698

699 Further information and requests for resources and reagents should be directed to and will be  
700 fulfilled by the Lead Contact, David Baltimore ([baltimo@caltech.edu](mailto:baltimo@caltech.edu)).

701

## 702 **Experimental Model and Subject Detail**

703

### 704 **Animals**

705 The California Institute of Technology Institutional Animal Care and Use Committee approved all  
706 experiments. C57BL/6 WT mice were bred and housed in the Caltech Office of Laboratory Animal  
707 Resources (OLAR) facility. C56BL6/J mice were sacrificed via CO<sub>2</sub> euthanasia and sterilized with  
708 70% ethanol. Femur and tibia bones harvested and stripped of muscle tissue. Bone marrow cells  
709 were resuspended in 20mL of fresh DMEM.  $2.5 \times 10^6$  bone-marrow cells plated in a 150mm dish in  
710 20mL of BMDM Media (DMEM, 20% FBS, 30% L929 condition media, and 1% Pen/Strep) and  
711 grown at 5% CO<sub>2</sub> and 37°C. BMDM media was completely replaced on day 3 as well as a  
712 supplemental addition of 5mL L929 condition media on day 5.

713

### 714 **Cell Culture**

723

724 Human embryonic kidney cells (HEK293T) from ATCC were cultured in DMEM supplemented with  
725 10% FBS and 1% Pen/Strep. Cell line was maintained at 37°C in 5% CO<sub>2</sub>.

726

### 727 **Method Detail**

728

### 729 **Knockdown Experiments**

730 BMDMs for knockdown experiments were grown as described above with a few additions. On days 3  
731 and 4, retrovirus encoding shRNAs were added to cells. On day 5, cells were selected with  
732 puromycin (5ug/mL). On day 8, following ~72 hours of puromycin treatment, media was removed  
733 and 10mL of PBS w/ 2mM EDTA was added. Cells were lightly scraped and replated in either 6 well  
734 plates or 10-cm dishes depending on the experiment. Cells were left in BMDM media overnight.  
735 The following day, cells were stimulated with either 20ng/mL of TNF $\alpha$ , 5ug/mL Poly(I:C) (Sigma), or  
736 ODN 1585 (1-5  $\mu$ M) (InvivoGen).

737

### 738 **RNA Isolation:**

739 Total RNA was purified from BMDMs using TRIzol reagent (Ambion) as per the manufacturer's  
740 instructions. Genomic DNA in RNA purifications was eliminated through treatment with Turbo  
741 DNase (Thermo Fisher Scientific) for 30 min at 37°C. 0.1-1 $\mu$ g RNA and 1 $\mu$ M dT(30) oligo (d14-954:  
742 5'-AAGCAGTGGTATCAACGCAGAGTACT(30)) was heated at 80°C for 2.5min followed by snap  
743 cooling on ice. 10 $\mu$ L template-switch RT mix added (10 $\mu$ M template-switch oligo (TSO: 5'-  
744 AAGCAGTGGTATCAACGCAGAGTACACArGrGrG), 20mM DTT, 2X ProtoScript II Reverse  
745 Transcriptase Reaction Buffer (NEB), 1mM dNTPs, 40U Murine RNase Inhibitor (NEB), and 200U  
746 ProtoScript II (NEB) Reverse Transcriptase. Reaction incubated in thermocycler with the following  
747 program: 1. 42°C for 30min, 2. 45°C for 30min, 3. 50°C for 10min, followed by deactivation of RT for  
748 10min at 80°C.

749

### 750 **RNA Fractionation:**

751 Confluent 10-cm dish of mature BMDMs were scraped into 400 $\mu$ L cold NP-40 lysis buffer, APJ1  
752 (10mM Tris-HCl (pH 7.5), 0.08% NP-40, 150mM NaCl). Lysed cells layered onto 1mL cold sucrose  
753 322 cushion, APJ2 (10mM Tris-HCl (pH 7.5), 150mM NaCl, 24% w/v sucrose) and centrifuged for  
754 10min at 4°C and 13000 rpm. The supernatant from this spin represents the cytoplasmic RNA  
755 fraction, which is immediately added to 3 volumes of 100% ethanol and 2 volumes of buffer RLT (4M  
756 GuSCN, 325 0.1M  $\beta$ -mercaptoethanol, 0.5% N-lauroyl sarcosine, 25mM Na-citrate, pH7.2) and

757 stored at -80°C until ready to purify RNA. Pellet, containing intact nuclei, is resuspended in 500µL  
758 TRIzol reagent. If the pellet was difficult to dissolve, it was heated at 50°C with occasional vortexing.  
759 100µL chloroform added and shaken vigorously for 15-20s; allowed to phase separate at room  
760 temperature for 5min. Tube centrifuged at 4°C and 12000 x g for 15min. Clear upper aqueous phase  
761 removed to a new tube, ensuring white DNA mid-phase is not removed, and is immediately added to  
762 3 volumes of 100% ethanol and 2 volumes of buffer RLT and stored at -80°C until ready to purify  
763 RNA. RNA is purified according to Qiagen RNeasy column protocol and eluted in 30µL nuclease-  
764 free H<sub>2</sub>O. RNA samples are DNase treated with Turbo-DNase and stored at -80°C.  
765

#### 766 **Library preparation and RNA-Seq Analysis**

767 Limited PCR amplifications was performed prior to library preparation. PCR reaction done with  
768 KAPA HiFi HotStart 2x ReadyMix, 5% cDNA, and 1µM primer (d14-955: 5'-  
769 AAGCAGTGGTATCAACGCAGAGTACT). Thermal cycler programmed for 120 seconds at 95°C as  
770 initial denaturation, followed by 14 cycles of 30sec at 95°C for denaturation, 30sec at 62.5°C as  
771 annealing, 150sec at 72°C for extension, and final extension at 72°C for 5 min. PCR reactions 0.9X  
772 SeraMag and eluted in 25µL. Concentrations of purified library determined using Qubit High  
773 Sensitivity dsDNA kit (Invitrogen) as described. Full length cDNA libraries were barcoded using the  
774 Nextera XT Tagmentation protocol (Illumina).  
775

#### 776 **RNA-Antisense Purification**

777 RNA antisense purification-mass spectrometry (RAP-MS) was performed as described in McHugh et  
778 al. with a few alterations. Briefly, we designed three 90-mer DNA oligonucleotide probes that were  
779 antisense to the complementary target RNA sequence in both *Irf7* and *Actb* transcripts. Each probe  
780 was targeted to a different location on the transcript and modified with a biotin in order to enable  
781 capture of DNA:RNA hybrids on streptavidin coated magnetic beads.

782 *RNA Prep and Lysis*: ~250million cells, or 25 150mm plates of BMDMs were used for each capture.  
783 Following stimulation with TNFα (20ng/ml) for 30 minutes, ~5-10 mL of PBS w/ 2mM EDTA was  
784 added to each plate and cells were removed by lightly scraping. Cells were pelleted, resuspended in  
785 PBS, and poured into a new 150mm plate. The cells were then crosslinked in Spectrolinker at 254  
786 nm wavelength with 0.8 J/cm<sup>2</sup> (instrument setting: 8000 x 100 uJ/cm<sup>2</sup>). Following crosslinking, cells  
787 were again pelleted, at which point the pellet could be frozen and stored at -80°C. Cells were lysed  
788 in 2mL of lysis buffer per capture (10 mM Tris pH 7.5, 500 mM LiCl, 0.5% Triton X-100, 0.2% sodium  
789 dodecyl sulphate, 0.1% sodium deoxycholate) supplemented with Protease Inhibitor Cocktail (EMD  
790 Millipore) and 1000 U of Murine RNase Inhibitor (New England Biolabs). We found the smaller the  
791 volume used per sample, the more efficient the capture was downstream and thus the minimum  
792 volume needed to lyse cells should be optimized. Samples were incubated for 10 min on ice to  
793 allow lysis. Following lysis, sample was passed through 20-gauge needle once and then 26-gauge  
794 needle 3-5 times to disrupt the pellet and shear genomic DNA. In between passing the sample  
795 through the 26-gauge needle, the sample was sonicated on ice with a microtip set at 5W power for a  
796 total of 30 s in intermittent pulses (0.7 s on, 1.3 s off). Samples were then mixed with twice the  
797 lysate volume of 1.5x LiCl/Urea Buffer (the final buffer contains 10 mM Tris pH 7.5, 500 mM LiCl,  
798 0.5% Triton X-100, 0.2% SDS, 0.1% deoxycholate, 4 M urea). Lysates were incubated on ice for 10  
799 min then cleared by centrifugation for 10 min at 4,000g.

800 *Pre-clearing lysate*: BioMag streptavidin beads (Bang Laboratories Inc.) were first washed 3x in  
801 0.25-0.5ml of 500mM LiCl/4M Urea buffer (10 mM Tris pH 7.5, 500 mM LiCl, 0.5% Triton X-100,  
802 0.2% SDS, 0.1% deoxycholate, 4 M urea). 50ul of beads were added to each sample and the  
803 samples were incubated at 37°C for 30 min with shaking. Streptavidin beads were then magnetically  
804 separated from lysate samples using a magnet. The beads used for pre-clearing lysate were  
805 discarded and the lysate sample was transferred to fresh tubes twice to remove all traces of  
806 magnetic beads. Input for quality control experiments can be removed at this point.

807 *Hybridization, Capture of Probes and Elution of Associated Protein*: Following pre-clearing, the  
808 biotinylated 90-mer DNA oligonucleotide probes specific for the RNA target of interest (vary per  
809 sample but ~5ul of 25uM per probe) were heat-denatured at 85°C for 3 min and then snap-cooled on



810 ice. Probes and pre-cleared lysate were mixed and incubated at 55°C with shaking for 2 h to  
811 hybridize probes to the capture target RNA. 500mL of washed streptavidin beads (Bang  
812 Laboratories Inc.) were then added to each sample at 55°C with shaking for 30 mins. Beads with  
813 captured hybrids were washed 6 times with LiCl/Urea Hybridization Buffer. If needed, 1% of the  
814 beads can be removed for qPCR quality control experiment. TRIzol reagent can be added directly to  
815 beads to elute RNA. Beads were then resuspended in Benzonase Elution Buffer (20 mM Tris pH  
816 8.0, 2 mM MgCl<sub>2</sub>, 0.05% NLS, 0.5 mM TCEP) and 125 U of Benzonase nonspecific RNA/DNA  
817 nuclease was added. Incubation occurred for 1-2 h at 37°C. Beads were then separated from the  
818 sample using a magnet. Supernatant was collected. Contaminant beads were removed by 5 rounds  
819 of magnetic separation on supernatant. Protein was precipitated overnight at 4°C with 10%  
820 trichloroacetic acid (TCA). TCA treated protein elution samples were pelleted by centrifugation for 30  
821 min at 20,000g, then washed with 1 ml cold acetone and recentrifuged. Final protein elution pellets  
822 were air dried to remove acetone, resuspended in fresh 8 M urea dissolved in 40 ml of 100 mM Tris-  
823 HCl pH 8.5, and stored at -20°C.

824 *Mass Spec Prep. and Analysis* Performed as in McHugh et al. with few exceptions. Instead of  
825 SILAC we label proteins at the mass spec prep step using TMT (Thermo). After desalting on a  
826 Microm Bioresources C8 peptide MicroTrap column and lyophilization of peptide fraction, lyophilized  
827 protein pellets were resuspended in 100mM TEAB at a concentration of 1ug/ul. We then added  
828 1.64ul of TMT labelling reagent to each ug of sample. The reaction was incubated for one hour at  
829 room temperature. The reaction was quenched with 0.32ul of 5% hydroxylamine per ug of protein  
830 used and incubated for 15 mins at room temperature. Following quenching, the samples were  
831 mixed, desalted as before, lyophilized, and mass spec was performed on Orbitrap Fusion mass  
832 spectrometer using a TMT instrument method as described in Liu et al.<sup>34</sup>  
833 Raw files were searched using MaxQuant (v. 1.5.3.30) against the UniProt mouse database (59550  
834 sequences) and a contaminant database (248 sequences). TMT 6plex was selected as the  
835 quantitation method with a reporter mass tolerance of 0.3. Oxidation of methionine and protein N-  
836 terminal acetylation were variable modifications and carbamidomethylation of cysteine was fixed  
837 modification. A 1% protein and peptide false discovery rate as estimated by the target-decoy  
838 approach was used for identification.

### 839 **RNA Immunoprecipitation**

841 RNA immunoprecipitations were performed as previously described. Between 5-10 confluent 15 cm<sup>2</sup>  
842 dishes of BMDMs per sample were stimulated with either 20ng/mL of TNF $\alpha$  for 30 minutes or  
843 5ug/mL Poly(I:C) for 12 hours. Following stimulation, proteins were cross-linked to DNA by adding  
844 formaldehyde directly to the media to a final concentration of 0.75%, with light shaking at room  
845 temperature for 10 mins. To quench the crosslinking reaction, glycine to a final concentration of 125  
846 mM was added to the media and incubated with shaking for 5 mins at room temp. Media was then  
847 aspirated and cells were rinsed twice with 10 mL of cold PBS. Following the second wash, cells  
848 were scraped into 10mL of PBS and spun down gently ( 5 min, 4°C, 1,000xg). Final cell pellet was  
849 resuspended in 0.1-1mL of polysome lysis buffer (100 mM KCl, 5 mM MgCl<sub>2</sub>, 10 mM HEPES (pH  
850 7.0), 0.5% NP40, 1 mM DTT, 100 U.ml RNase Inhibitor (NEB)) supplemented with Protease Inhibitor  
851 Cocktail (EMD Millipore). At this point the mRNP lysate was frozen. If needed, passing the lysate  
852 through a small gauge needle can help with lysate. Protein-G beads were pre-treated at 4°C with  
853 NT2 (50 mM Tris-HCl (pH 7.4), 150 mM NaCl, 1 mM MgCl<sub>2</sub>, 0.05% NP40) supplemented with 5%  
854 BSA to a final ratio of 1:5 for at least 1h before use. Appropriate amount of antibody per sample  
855 (optimized based on antibody used but typically ~1-10ug) was added to 250-500ul of bead/BSA  
856 slurry and incubated at 4°C. Following incubation, beads were spun down and washed with 1 ml of  
857 ice-cold NT2 buffer 4–5 times. Following final wash, beads were resuspended in 850ul of NT2 and  
858 supplemented with 200U of RNase inhibitor, 10  $\mu$ l of 100 mM DTT and EDTA to 20 mM. Frozen  
859 lysate was thawed and centrifuged at 15,000\*g for 15 mins. The cleared supernatant was removed  
860 and 100ul was added to the prepared beads. Input removed at this step. Beads and lysate were  
861 incubated for 4h at 4°C with mixing. The beads were washed 4-5 times with ice-cold NT2 and then  
862 resuspended in 100ul of NT2 buffer. 4ul of 5M NaCl was added incubated with shaking at 65°C for 2

863 hours. NT2 buffer can also be supplemented with 30 µg of proteinase K to release the RNP  
864 component. RNA was isolated by adding TRIzol reagent (Ambion) as per the manufacturer's  
865 instructions. RNA was reverse transcribed and quantification was performed using TaqMan qPCR.

#### 866 867 **Immunoblot**

868 BMDM samples were prepared as described previously. On day 8, they were plated at similar  
869 density. Following adherence, BMDMs were stimulated with Poly(I:C) or CpG for the indicated time.  
870 Cells were scraped into subcellular fractionation buffer (20mM HEPES (pH 7.4), 10 mM KCl, 2 mM  
871 MgCl<sub>2</sub>, 1mM EDTA, 1 mM EGTA). The cells were then passed through a 27 gauge needle 10 times,  
872 incubated on ice for 10 mins, and spun down at 720xg for 5 min. The pellet contained the nuclei,  
873 which was washed with fractionation buffer, passed through a 25 gauge needle 10 times, and  
874 centrifuged again at 720xg for 10 mins. The resulting pellet was resuspended in RIPA lysis buffer.  
875 Equal amounts of proteins were analyzed by immunoblot using the following reagents: anti-IRF7  
876 (Millipore, ABF130), anti-Lamin B1 HRP conjugate (Cell Signalling, D9V6H), and anti-rabbit IgG  
877 HRP conjugate (Cell Signalling).

#### 878 879 **Viral Plaque Assays**

880 Plaque assays were done on Vero cells. 2.5\*10<sup>5</sup> vero cells were plated in a 12 well plate the night  
881 before infection. Prior to infection, cells were checked to ensure confluence. VSV was serially  
882 diluted and infected in 12 well plate for 1 h. VSV was then removed and cells were layered carefully  
883 with DMEM supplemented with 2% FBS and 0.4% agarose. Plate was incubated for 2 days, and  
884 then fixed with 10% formaldehyde, for 1 h to overnight. Finally, agarose plugs were removed  
885 carefully and cells were stained with crystal violet.

#### 886 887 **VSV-GFP Infection Experiment**

888 BMDMs were grown as described above in 150mm dishes. On day 8, following ~72 hours of  
889 puromycin treatment, media was removed and 10mL of PBS w/ 2mM EDTA was added. Cells were  
890 lightly scraped and 250,000 cells/well were replated in 12 well plates in BMDM media. Cells were  
891 left for 12 hours to adhere. Following adherence, VSV-GFP was added at the specified MOI for the  
892 specified amount of time. Following the time-course, cells were lightly scraped, washed and spun  
893 down, and resuspended in PBS. Samples were analyzed on a MACSQuant10 Flow Cytometry  
894 machine (Miltenyi). Gating strategy depicted in Fig. 7.

#### 895 896 **VSV-GFP Viral Supernatant Experiment**

897 BMDMs were grown as described above in 150mm dishes. On day 8, following ~72 hours of  
898 puromycin treatment, media was removed and 10mL of PBS w/ 2mM EDTA was added. Cells were  
899 lightly scraped and 400,000 cells/well were replated in 12 well plates in BMDM media. Cells were  
900 left to adhere for 12 hours, before being infected at an MOI of 25 for 8 hours. Following infection,  
901 virus was removed and the cells were washed with PBS three times. Then, 500ul of BMDM media  
902 (DMEM, 20% FBS, 30% L929 condition media, and 1% Pen/Strep) was added to each well. 18  
903 hours later, media was collected and stored at -80°C. To titer viral supernatant, Vero cells were  
904 plated in a 96-well plate at 30,000 cells per well in 90ul of D10 media. 12 hours after plating, 90ul  
905 supernatant was added to the 90ul of D10 at different dilutions. PFU/mL was calculated from a  
906 standard curve with a virus of known concentration.

#### 907 908 **Quantification and Statistical Analysis**

909 All statistical analysis was performed in Python (version 2.7.9). Unless otherwise indicated in figure  
910 legends, statistical significance measurements were marked as follows: \* denotes p < 0.05, \*\* denotes  
911 p < 0.01, \*\*\* denotes p < 0.001, and n.s. denotes not significant. RNA-Seq expression and splicing  
912 analysis as well as eCLIP analysis is described in more detail below.

#### 913 914 915 **RNA-Sequencing Analysis**

916 Sequencing was performed on a HiSeq 2500 High Throughput Sequencer (Illumina). Single-end 50-  
917 mer reads were aligned using Tophat v2.1.1.<sup>35</sup> Gene expression was determined using Cufflinks  
918 v2.2.1 and the FPKM (Fragments Per Kilobase Million) metric.<sup>36</sup>

919

### 920 **Splicing Ratio and $\Delta$ SR Calculation**

921 A custom script was written in Python using the HTSeq<sup>37</sup> library to calculate Splicing Ratio. First,  
922 reads that map to an intron or exon feature are summed. To map to a feature, reads must have >1  
923 bp overlap with the feature. If a read maps to more than one feature, such as in the case of a splice  
924 junction read, the read is split between the features. SR is calculated by taking the length  
925 normalized number of reads that map to each intron, divided by the average length normalized  
926 number of exon reads plus the length normalized intron value. When SR is equal to 0, this indicates  
927 a junction is completely spliced. In contrast, large SR values indicate intron retention.

928 We use the SR value to calculate  $\Delta$ SR, which is equal to SR(shBud13) – SR(Ctl). Values greater  
929 than 0 indicate the junction is more unspliced in the shBud13 sample, whereas values less than 0  
930 indicate the junction is more unspliced in the Ctl sample. For the global analysis, in order for the  
931  $\Delta$ SR of a junction to be considered, it must pass through a number of filters. To account for  
932 transcripts that are annotated in Ensembl version 67, but not expressed, we set an FPKM threshold  
933 of 15. Further, a local normalized read count threshold on the upstream/downstream exons was  
934 implemented to ensure a level of sequencing depth needed to get accurate splicing values. To pass  
935 this threshold, the sum of the reads that map to the the upstream/downstream exons divided by the  
936 length of these exons must be  $\geq 0.25$ .

937

### 938 **ISG and Genome-Wide Analysis**

939 ISGs used in Fig. 4 E-H were selected based on induction 2 hours after *in vivo* IFN $\alpha$  injection.<sup>15</sup> We  
940 classified ISGs to be any gene with a fold change  $\geq 3.5$  following 2 hours of induction. Intron RPKM  
941 was calculated using a custom python script with the HTSeq library. In Fig. 5a, transcripts from the  
942 30 min. TNF $\alpha$  data-set that had a junction with a  $\Delta$ SR value above 0.15 were sorted into an  
943 'increased IR' category ( $\Delta$ SR >0.15), whereas all other transcripts were sorted into an unaffected  
944 category ( $\Delta$ SR <-0.15). The selected data-set is representative of all time-points from the TNF $\alpha$ ,  
945 Poly(I:C) and CpG datasets. A maximum entropy model was used to calculate 3' and 5' splice site  
946 strengths.<sup>12</sup> To determine differences in 5' splice site sequence for Bud13 dependent junctions, the  
947 nine base pair sequence near the 5' splice site junctions for junctions that had a  $\Delta$ SR >0.15 was  
948 compared to all expressed junctions (FPKM>1). The top Bud13 dependent junctions were plotted  
949 based on the average  $\Delta$ SR value across all time-points from the TNF $\alpha$  data-set (Fig. 5D) as well as  
950 the Poly (I:C) data-set (Fig. 5H). Junctions that had a  $\Delta$ SR value <0.15 in a time-point were filtered  
951 out in the TNF $\alpha$  data-set, while junctions that had a  $\Delta$ SR value <0.15 in two time-points were filtered  
952 out in the Poly (I:C) data-set. The zero time-point was removed for the transcripts induced by the  
953 stimulant (Irf7 and Cd14). For the comparison of alternative splicing events, rMATS<sup>38</sup> was used on  
954 the TNF $\alpha$  data-set. Splicing events were deemed significant if  $p < 0.05$  and FDR < 0.1 for all time-  
955 points. SVMBPfinder was used to determine BP related features (BP strength and distance from BP  
956 to 3' splice site).<sup>39</sup>

957

### 958 **eCLIP**

959 Data for eCLIP experiments were downloaded from ENCODE Project Consortium.<sup>18</sup> Analysis of  
960 eCLIP data is the same as has been described previously.<sup>40</sup> Fold change of eCLIP read density  
961 compared to input read density along a normalized intron was calculated using ngs.plot.<sup>41</sup> Peaks  
962 were called using CLIPper.<sup>42</sup> Peaks were deemed significant if they were >3-fold enriched and had  
963  $p$ -value <  $10^{-5}$ . Peak locations were determined using a custom python script with the HTSeq library.  
964 Enriched GO terms were determined using Seten.<sup>43</sup>

965

966

967

### 968 **Data and Software Availability**

969  
970  
971  
972

The next-generation sequencing data reported in this study will be deposited to the Gene Expression Omnibus (GEO). Upon completion of deposit, the accession number for this data will be provided.

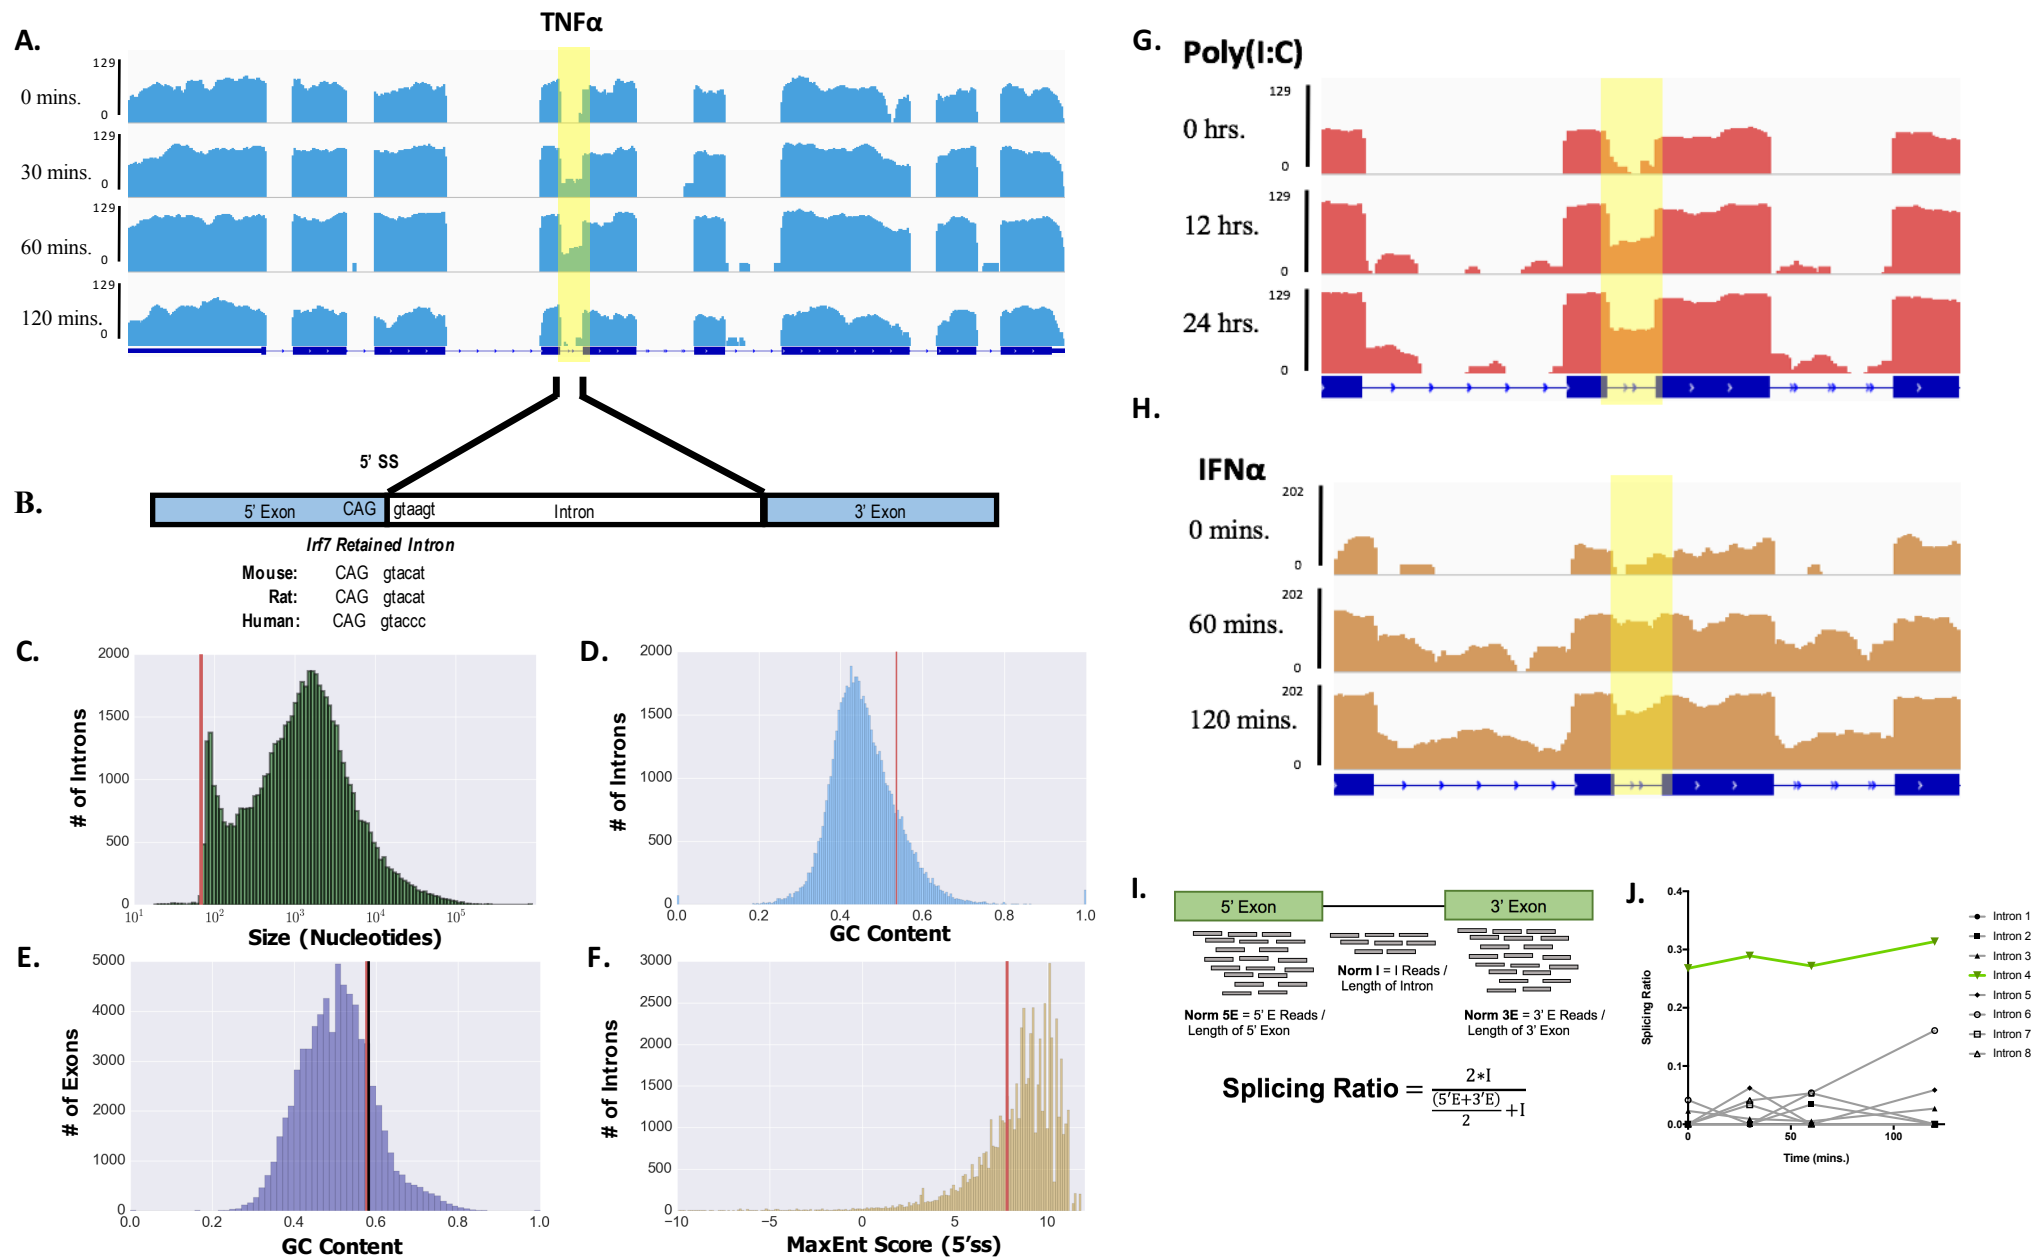

**Figure 1: *Irf7* contains a weak intron that is retained following many forms of stimulation.**

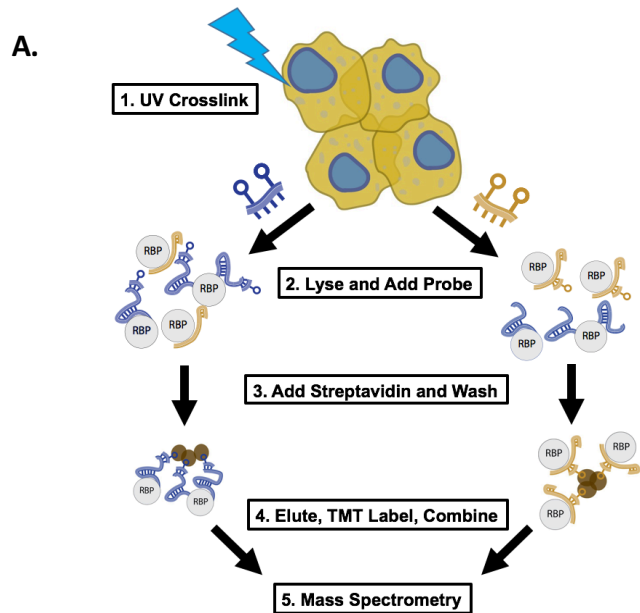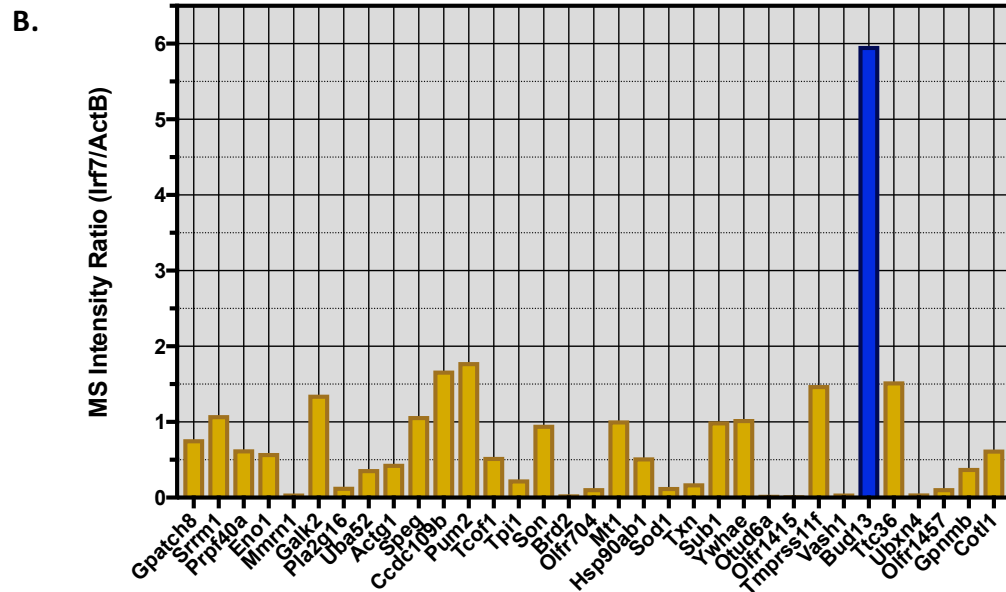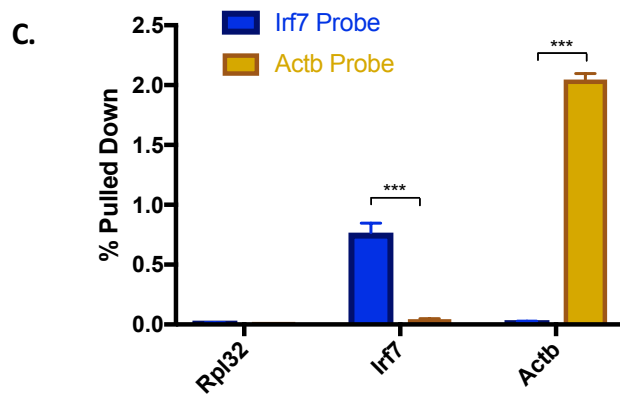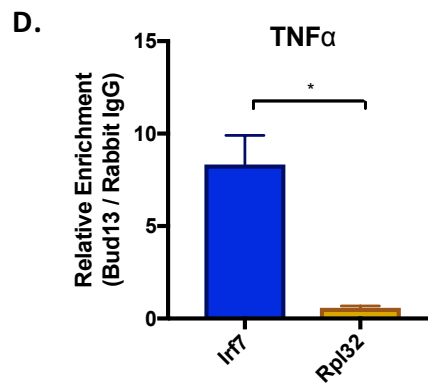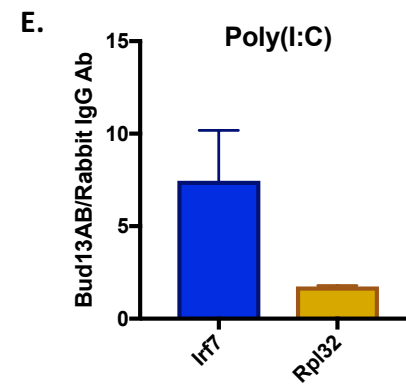

Figure 2: RAP-MS and RIP identify Bud13 as an RNA binding protein that interacts with IRF7 mRNA

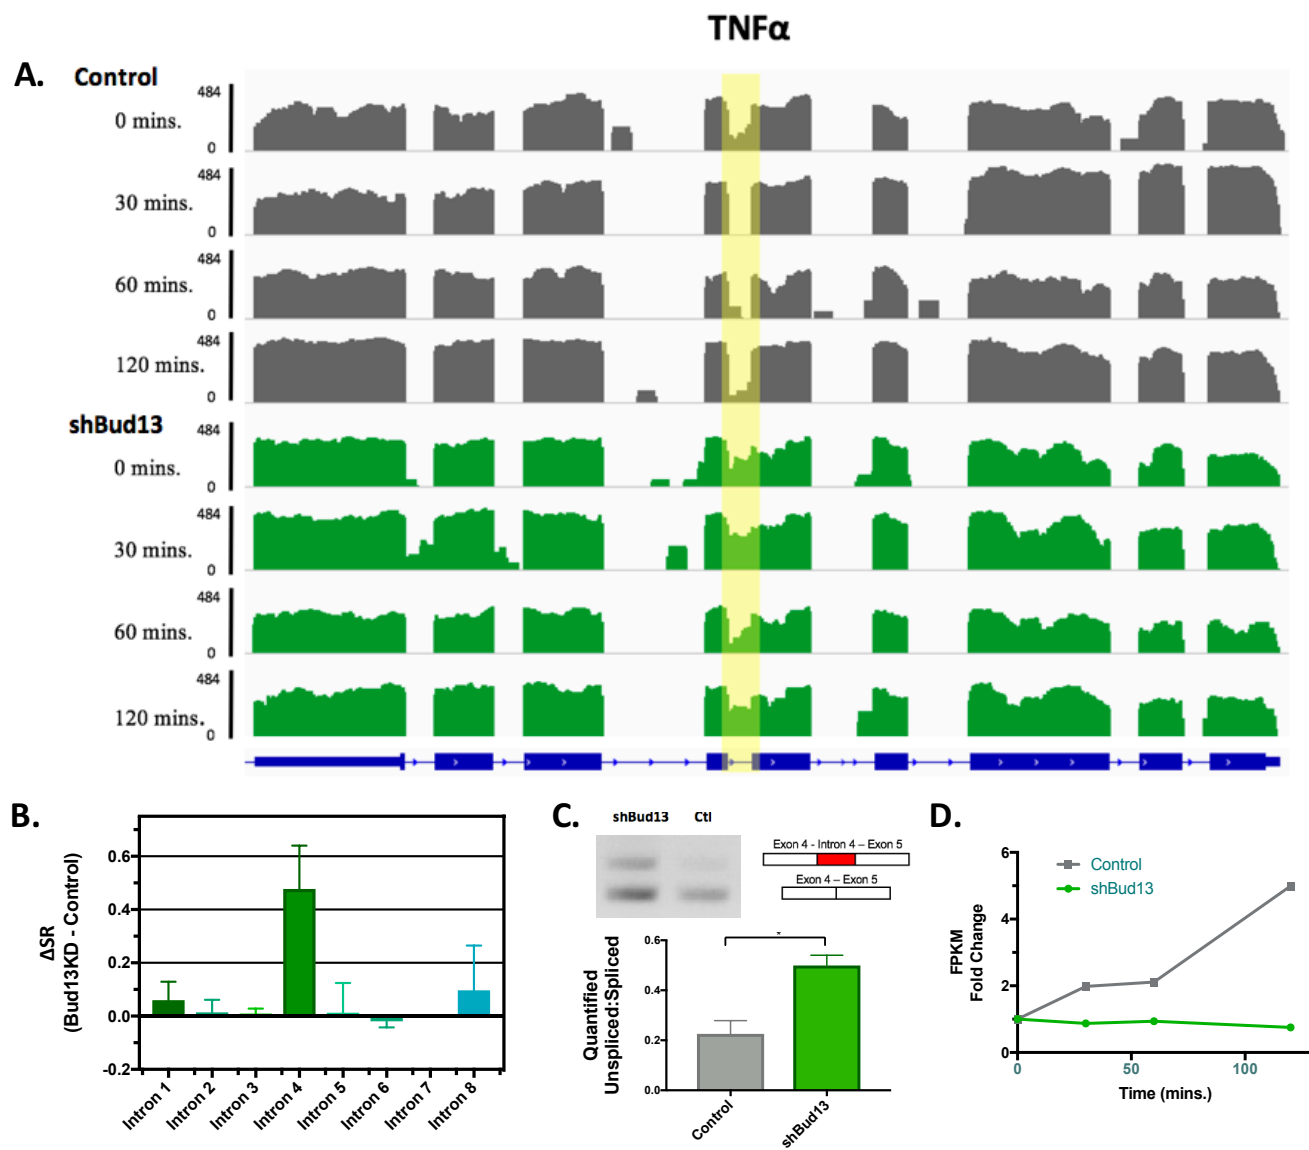

**Figure 3: Bud13 knockdown leads to increased retention in the poorly splicing intron of *Irf7***



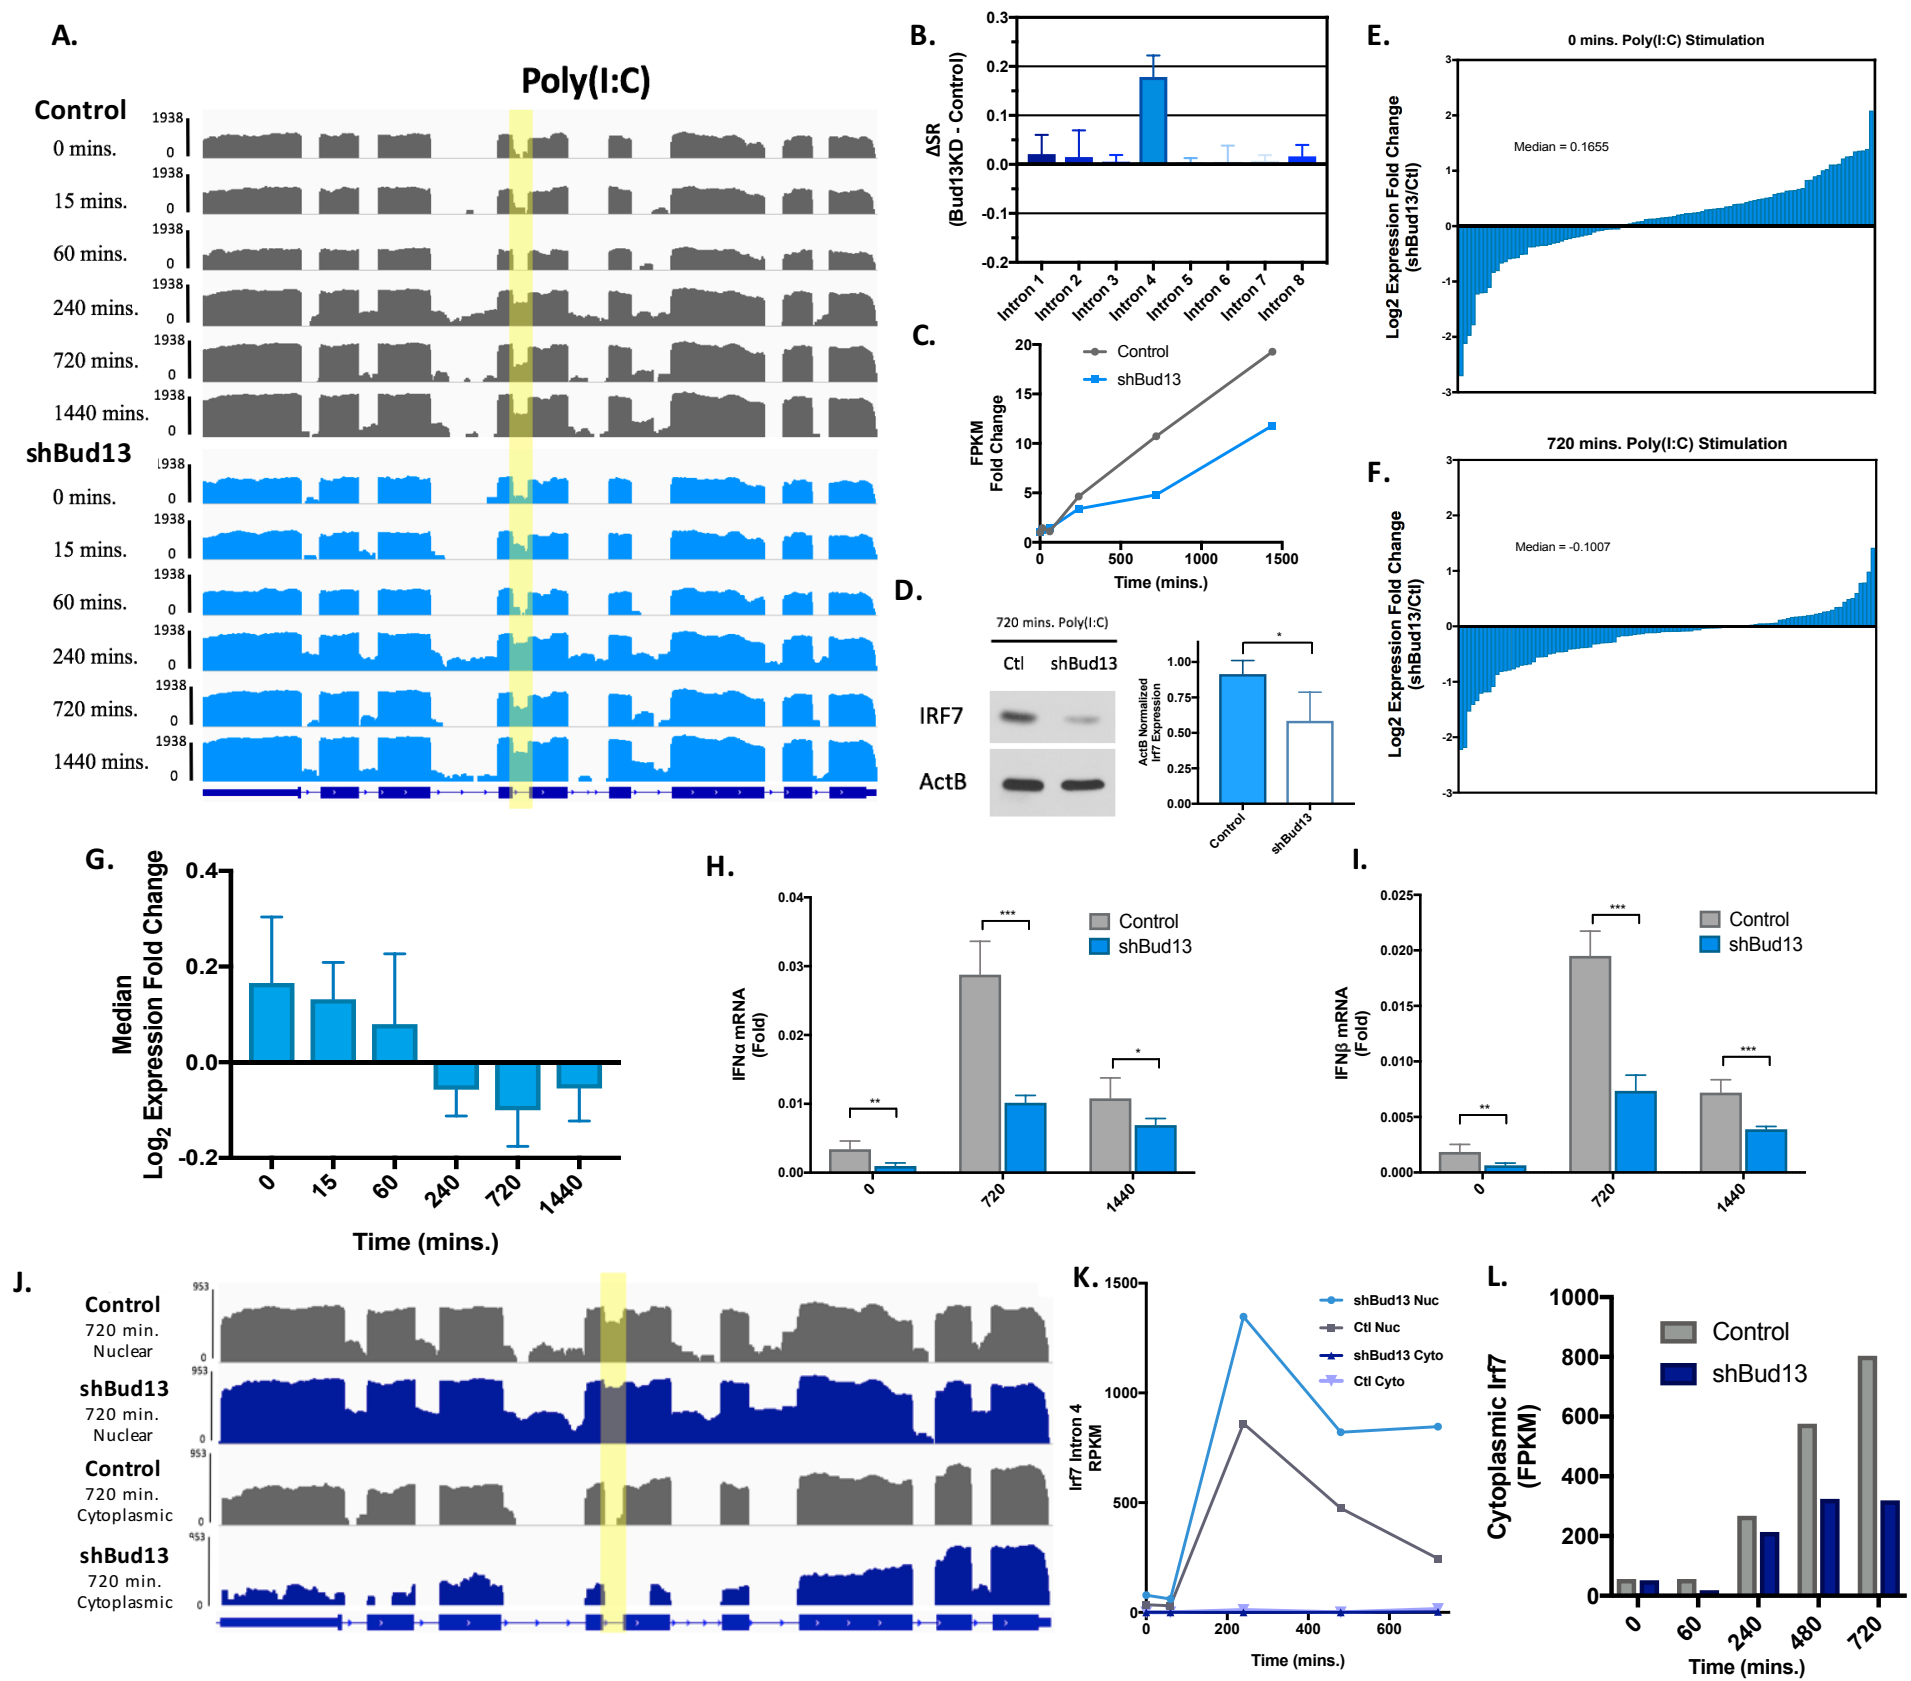

Figure 4: Bud13 knockdown alters the type I interferon response



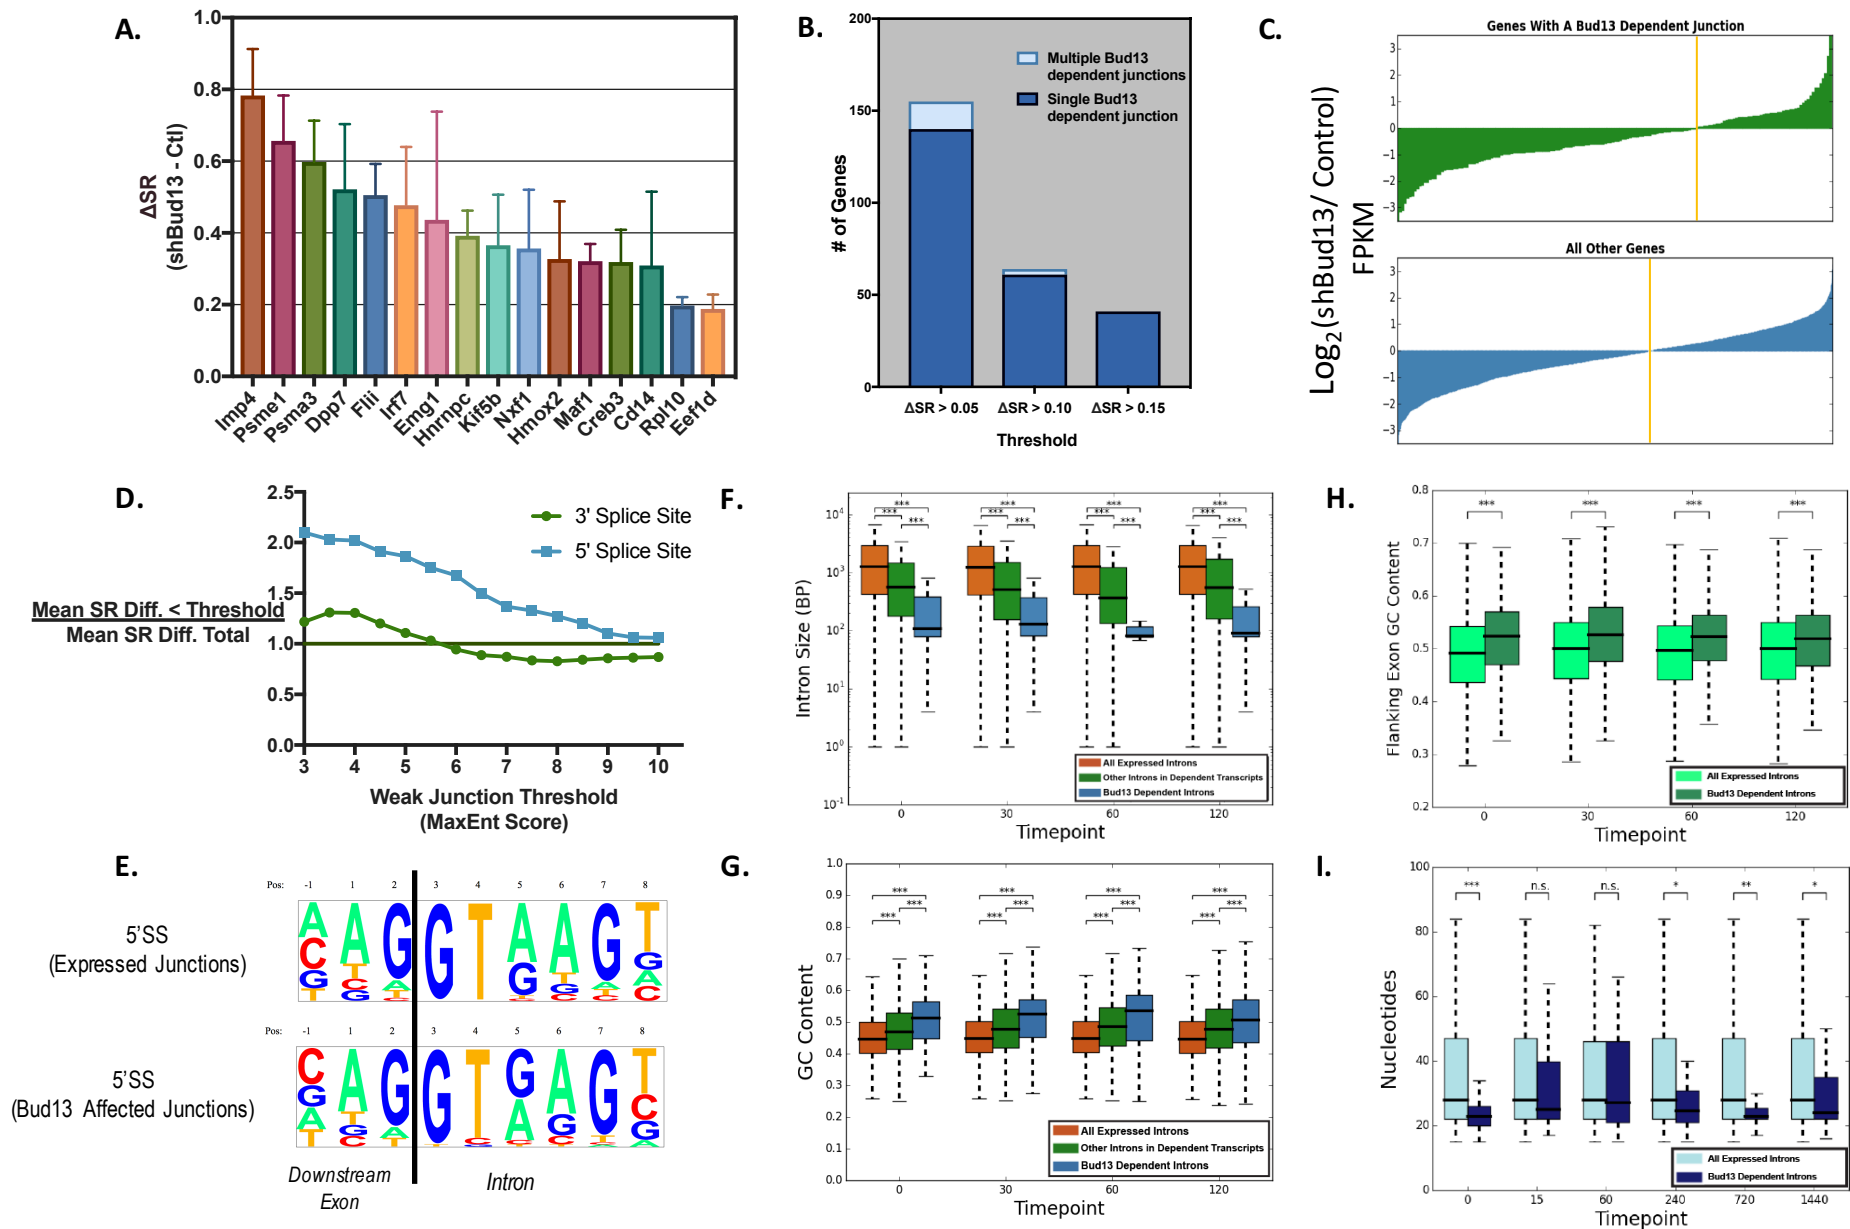

**Figure 5: Global analysis of the role of Bud13.**

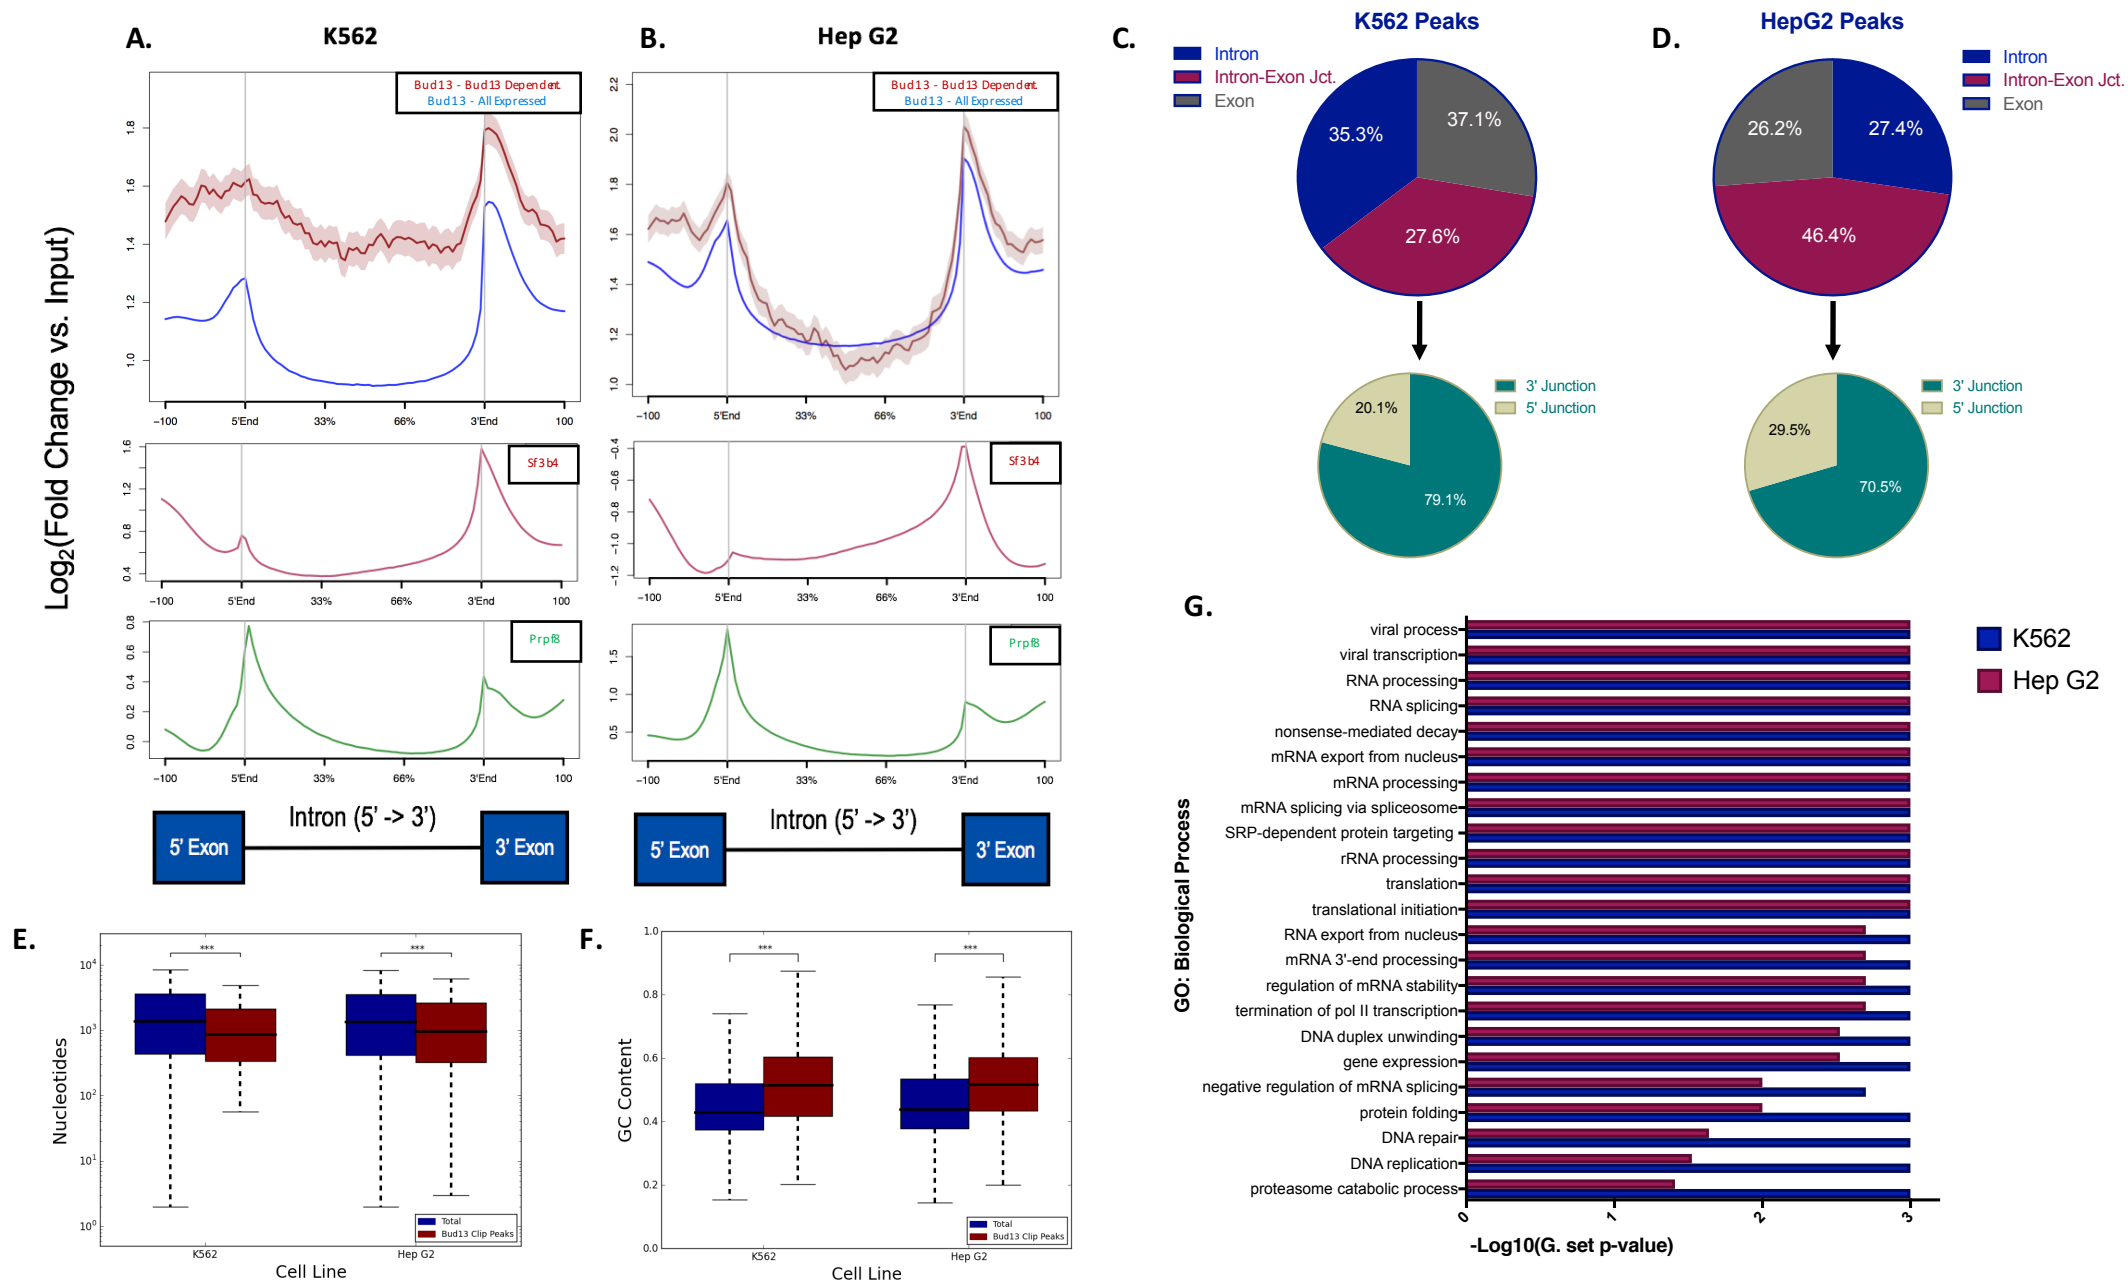

**Figure 6: Bud13 interacts with Bud13 dependent junctions near the 3' splice site.**

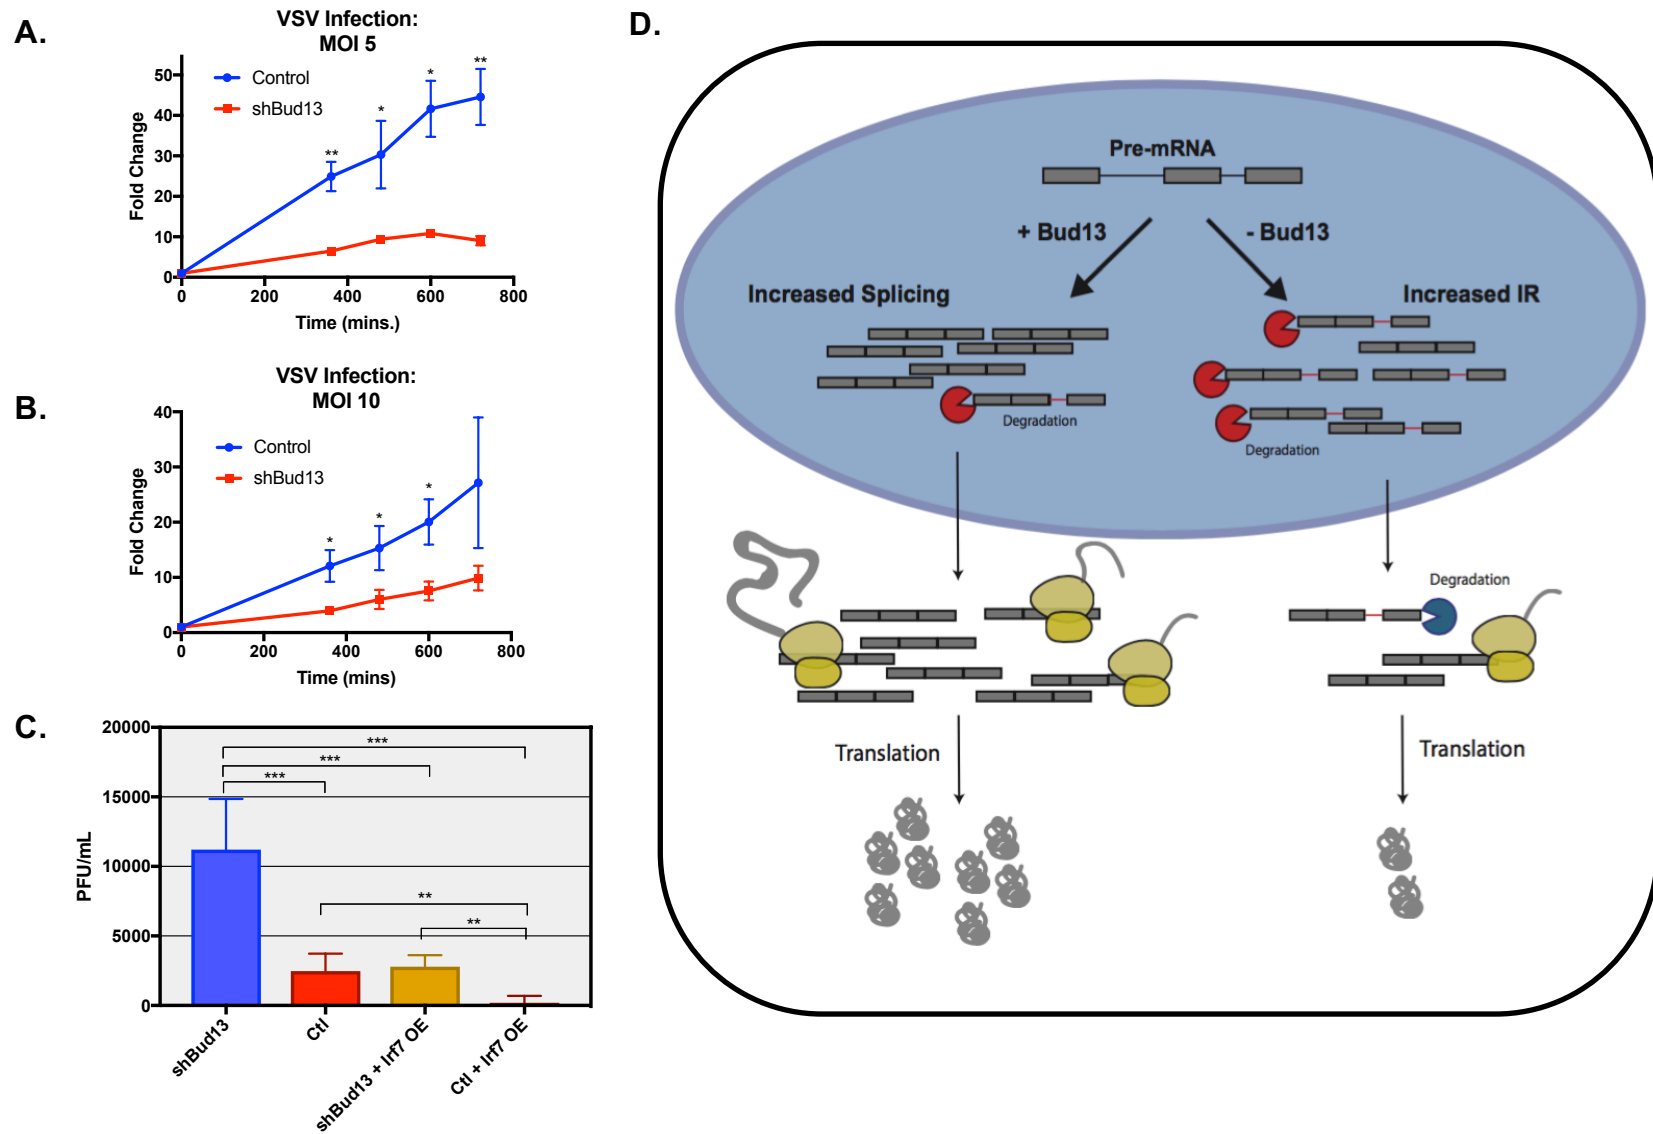

**Figure 7: Bud13 knockdown alters the BMDM response to VSV.**

## FIGURE LEGENDS

**Figure 1: *Irf7* contains a weak intron that is following many forms of stimulation.** (A) Histogram of mapped reads corresponding to the TNF $\alpha$ -induced expression of *Irf7*. The poorly spliced fourth intron is highlighted. For all read density plots, reads are histogrammed in log<sub>10</sub> scale and normalized to the maximum value across the stimulation. (B) Comparison of *Irf7* splice donor and acceptor sites in mice, rats, and humans. (C-F) Histogram representing the intron length (C), intron GC content (D), flanking exon GC content (E), or 5' splice site strength of introns of expressed in BMDMs. Red represents location of *Irf7* intron 4 (C, D, F) or upstream exon (E). Black line represents downstream exon (E). (G, H) Histogram of mapped reads corresponding to the IFN $\alpha$  (G) and poly(I:C) (H) induced expression of *Irf7* focused on the slow splicing fourth intron. (I) Outline of Splicing Ratio (SR) metric. (J) Splicing ratio for all introns in *Irf7* plotted against time stimulated with TNF $\alpha$ .

**Figure 2: RAP-MS and RIP identifies Bud13 as an RNA binding protein that interacts with IRF7 mRNA.** (A) Outline of the RAP-MS procedure used to identify RNA-binding proteins on transcripts of interest. (B) TMT ratio (*Irf7*/Actb) for proteins identified as enriched on either *Irf7* (TMT ratio >1) or Actb (TMT ratio <1) transcripts. (C) RT-qPCR analysis of transcripts captured via RAP for *Irf7* (blue) and Actb (gold) probes. (D) RIP followed by RT-qPCR for *Irf7* and Rpl32 in TNF $\alpha$  stimulated BMDMs. Shown is the relative enrichment of transcripts captured in Bud13 RIP as compared to Rabbit IgG RIP. (E) Same as (d) except stimulation with poly(I:C). Data are representative of two independent experiments ((C-E), mean + SEM). \*P < 0.05, \*\*P < 0.01 and \*\*\*P < 0.001 (t-test).

**Figure 3: Bud13 knockdown leads to increased retention in the poorly splicing intron of *Irf7*.** (A) Histogram of mapped reads corresponding to the TNF $\alpha$ -induced expression of *Irf7*. The poorly spliced fourth intron is highlighted. shBud13 samples are shown in green. Control samples are shown in grey. (B)  $\Delta$ SRs calculated for each junction in the *Irf7* transcript. The  $\Delta$ SR of intron 4 as compared to all other junctions is significant (Student's t-test, p<0.001). No other pairwise comparison is significant. (C) Splicing gel from RNA extracted from BMDMs stimulated for 30 mins. TNF $\alpha$  (top). Quantification of splicing gel (bottom). (D) *Irf7* FPKM fold change with respect to time stimulated. shBud13 is shown in green, control is shown in grey. Data is representative of two independent experiments (C) and is represented as mean + SEM. \* denotes p < 0.05, \*\* denotes p < 0.01, and \*\*\* denotes p < 0.001 using a Student's t test.

**Figure 4: Bud13 knockdown alters the type I interferon response.** (A) Histogram of mapped reads corresponding to the TNF $\alpha$ -induced expression of *Irf7*. The poorly spliced fourth intron is highlighted. shBud13 samples are shown in blue. Control samples are shown in grey. (B)  $\Delta$ SRs calculated for each junction in the *Irf7* transcript. The  $\Delta$ SR of intron 4 as compared to all other junctions is significant (Student's t-test, p<0.001). No other pairwise comparison is significant. (C) *Irf7* FPKM fold change with respect to time stimulated. shBud13 is shown in blue, control is shown in grey. (D) Immunoblot analysis of *Irf7* protein following 720 mins. poly(I:C) stimulation (left). Quantification relative to ActB (right). (E) Log<sub>2</sub> expression fold change (shBud13/control) for 119 ISGs in unstimulated BMDMs (median = 0.1655). (F) As in (E) for stimulated BMDMs (720 mins poly(I:C) (median = -0.1007). Wilcoxon rank-sum between (E) and (F), P< .001. (G) Median log<sub>2</sub> expression fold change (shBud13/control) for ISGs in unstimulated BMDMs, and BMDMs stimulated with Poly(I:C) 15, 60, 240, 720, and 1440 mins. Bars represent 95% CI. (Wilcoxon rank-sum, P< .001, for any of the 'early' time-points (0, 15, 60 mins) compared to any of the 'late' time-points (240, 720, 1440 mins). (H) RT-qPCR analysis of IFN $\alpha$  mRNA levels in unstimulated BMDMs and BMDMs stimulated with poly(I:C) for 720 mins and 1440 mins. (I) Same as (H) for IFN $\beta$ . (J) Nuclear fraction (top) and cytoplasmic fraction (bottom) histograms of mapped reads corresponding to the poly(I:C)-induced expression of *Irf7* (720 mins). The poorly spliced fourth intron is highlighted. shBud13 samples are shown in blue. Control samples are shown in grey. Nuclear  $\Delta$ SR = 0.35. (K) Nuclear and cytoplasmic RPKM for *Irf7* intron 4 from fractionated BMDMs stimulated with poly(I:C). (L) Cytoplasmic *Irf7* FPKM for control (grey) and shBud13 BMDMs stimulated with poly(I:C). Data is representative of four independent experiments (H, I) and is represented as mean + SEM. \* denotes p < 0.05, \*\* denotes p < 0.01, and \*\*\* denotes p < 0.001 using a Student's t test. Results are presented relative to those of Rpl32 (H,I).

**Figure 5: Global analysis of the role of Bud13.** (A) Ranked bar chart showing genes with a junction most affected by Bud13 knock-down in all samples during TNF $\alpha$  stimulation. See S7 for histograms relating to most affected junctions. (B) Grouped bar chart depicting the number of genes that have a single Bud13 affected junction vs. multiple Bud13 affected junctions using three different  $\Delta$ SR thresholds. (C) Transcripts were classified as 'Bud13 dependent' if they had a junction with a  $\Delta$ SR. >0.15. The log<sub>2</sub> expression fold change (FPKM shBud13/ FPKM control) for each gene represented by the transcripts in the 'Bud13 dependent' category as well as all other genes is shown. Median 'increased IR' = -0.5084. Median 'decreased IR' = -0.2170. (Wilcoxon rank-sum,  $P < .01$ ). (D) Mean  $\Delta$ SR. for junctions below the indicated threshold (x-axis) vs. mean  $\Delta$ SR. for all junctions. Threshold applied for the 5' splice site (blue) and the 3' splice site (green). (E) 5'SS motif for all expressed junctions as compared to junctions that show retention upon Bud13 knockdown ( $\Delta$ SR. > 0.15). (F) Size of intron for introns retained upon Bud13 knockdown ( $\Delta$ SR. > 0.15) (blue), in introns located in the same transcript as those affected by Bud13 (green), and in introns from all expressed transcripts (orange). (G) Same as (F) for GC content. (H) Flanking exon GC content for exons that flank introns retained upon Bud13 knockdown ( $\Delta$ SR. > 0.15) (dark green) as compared to exons that flank introns from all expressed transcripts (light green). (I) Distance from the branch point to the 3' splice site for introns retained upon Bud13 knockdown ( $\Delta$ SR. > 0.15) (dark blue) as compared to introns from all expressed transcripts (light blue). (F-I) data from BMDM TNF $\alpha$  stimulation. Box plots show median (center line), interquartile range (box) and tenth and ninetieth percentiles. \* $P < 0.05$ , \*\* $P < 0.01$  and \*\*\* $P < 0.001$  (Mann-Whitney  $U$ -test).

**Figure 6: Bud13 interacts primarily near the 3' splice site of small, GC rich introns.** (A) eCLIP-seq read density plots in K562 cells. Bud13 density plot over all expressed junctions shown in blue (top), Bud13 density plot over Bud13 dependent junctions shown in red (top). Sf3b4 density plot over all expressed junctions shown in maroon (middle), and Prpf8 density plot over all expressed junctions is shown in green (bottom). (B) Same as in (A) but for Hep G2 cells. (C) Bud13 eCLIP-seq peak distribution. Peaks fell within either intronic regions, intron-exon junctions, or exonic regions. Peaks that fell within intron-exon junction were further classified as 5' junction peaks or 3' junction peaks (bottom). (D) Same as (C) but for Hep G2. (E) Size of all introns in expressed transcripts for the given cell line (dark blue) vs size of introns with overlapping eCLIP peak (maroon). Shown in K562 (left) and Hep G2 (right) cells. Box plots show median (center line), interquartile range (box) and tenth and ninetieth percentiles (whiskers). \* $P < 0.05$ , \*\* $P < 0.01$  and \*\*\* $P < 0.001$  (Mann-Whitney  $U$ -test). (F) Same as (E) for GC content. (G) GO terms (biological process) enriched among Bud13 eCLIP peaks in K562(dark blue) and Hep G2 (maroon) cells.

**Figure 7: Bud13 knockdown alters the BMDM response to VSV.** (A) RT-qPCR analysis of Irf7 mRNA levels in infected control or shBud13 BMDMs stimulated with VSV (MOI 5) across 24 hours. (B) Same as in (A) except stimulated at an MOI of 10. Results are presented relative to those of Rpl32. (C) PFU/mL for viral supernatant from infected shBud13 (blue), control (red), shBud13 with Irf7 overexpression (yellow), or control with Irf7 overexpression (maroon) BMDMs. Data is representative of two (A, B) or three independent experiments (C) and is shown as mean + SEM. \* denotes  $p < 0.05$ , \*\* denotes  $p < 0.01$ , and \*\*\* denotes  $p < 0.001$  using a Student's  $t$  test

# SUPPLEMENTAL FIGURES

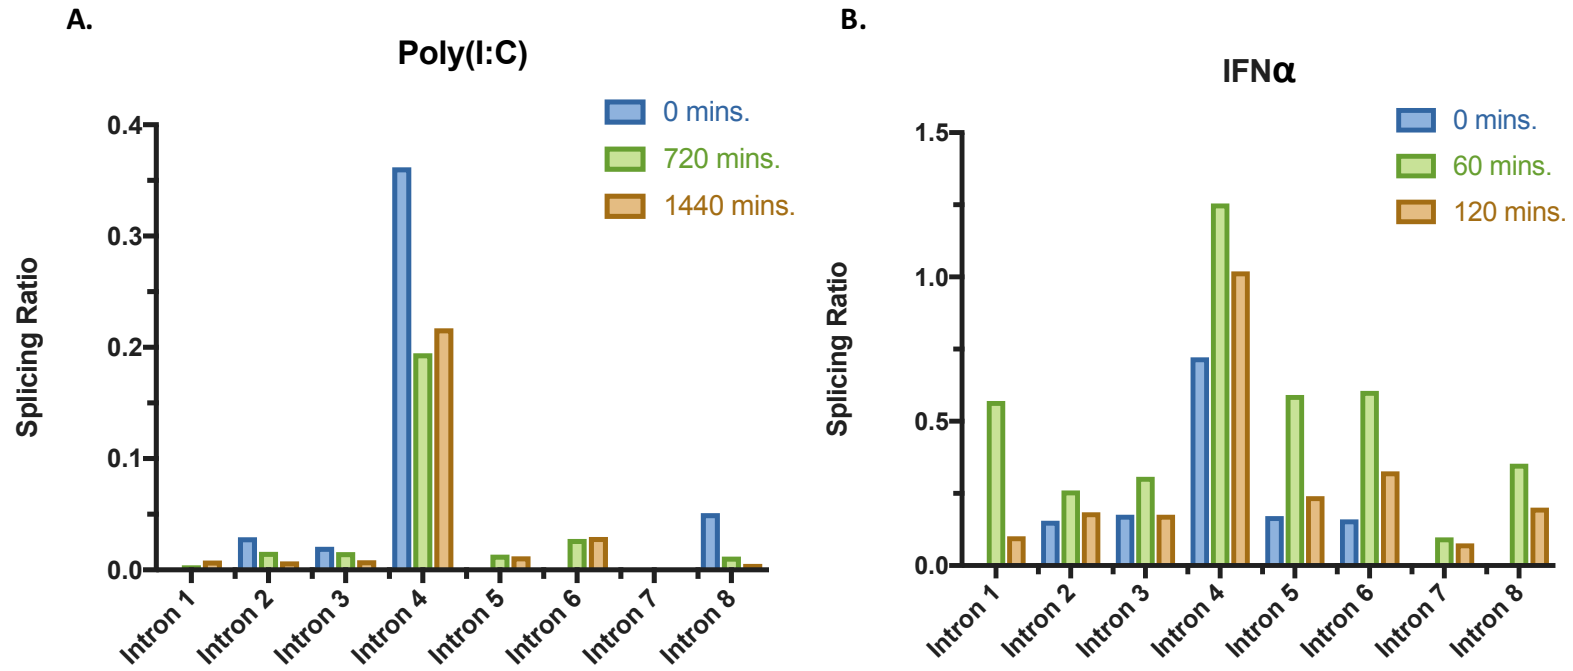

Figure S1: Splicing Ratios across all junctions in *Irf7*

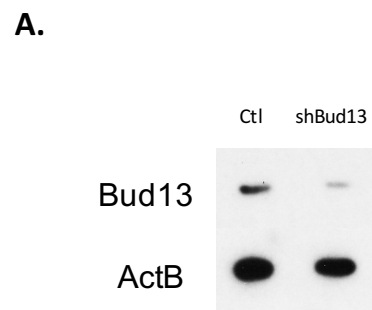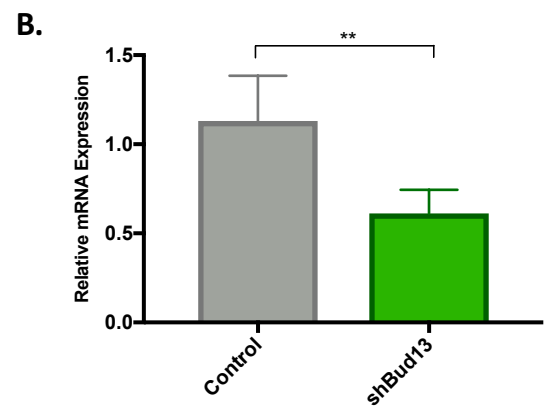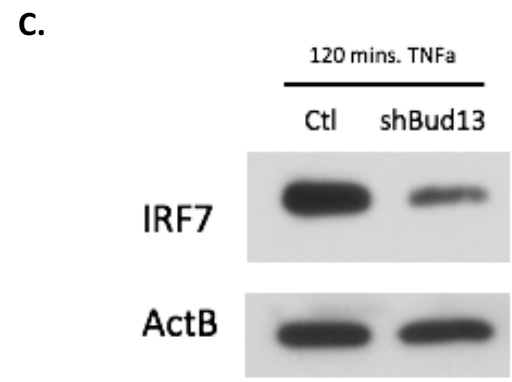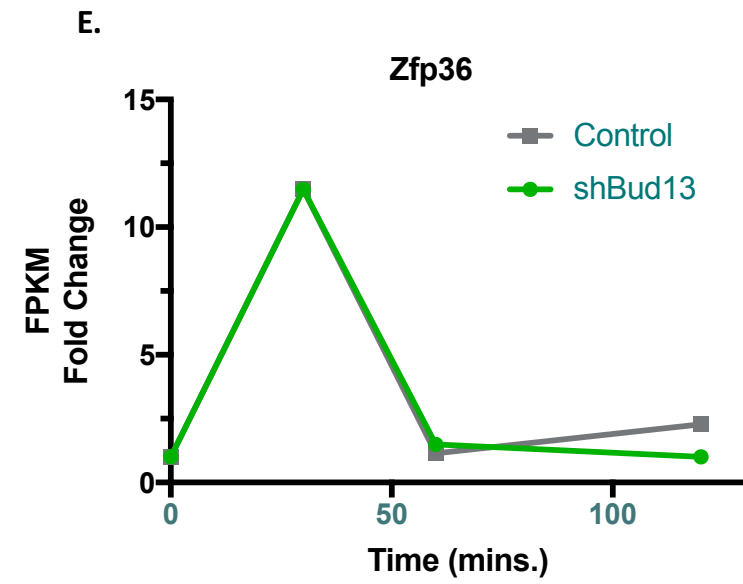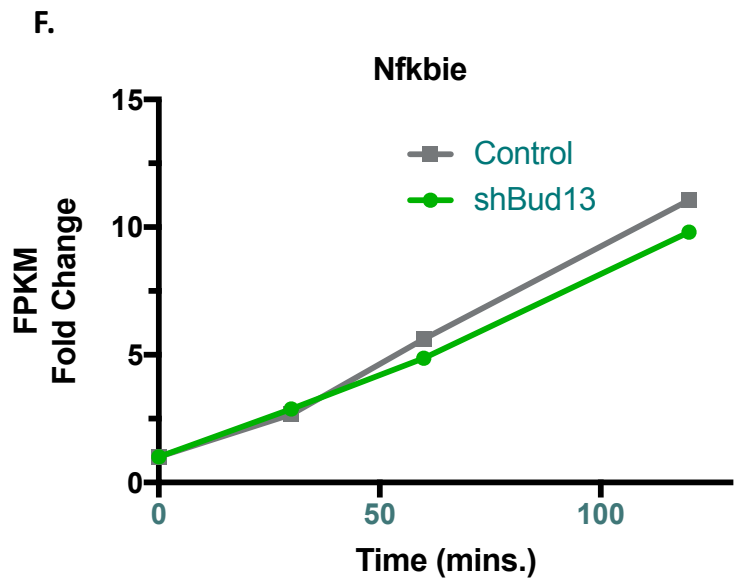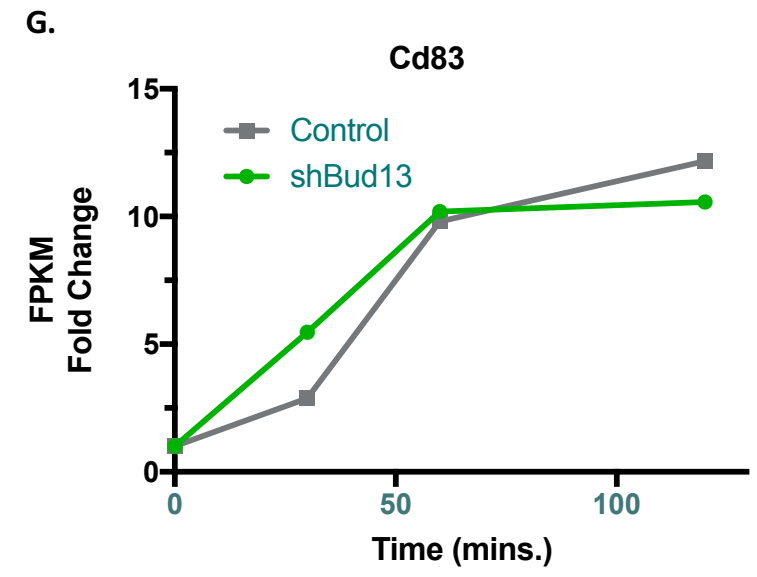

Figure S2: shBud13 knocks down Bud13 protein and mRNA.

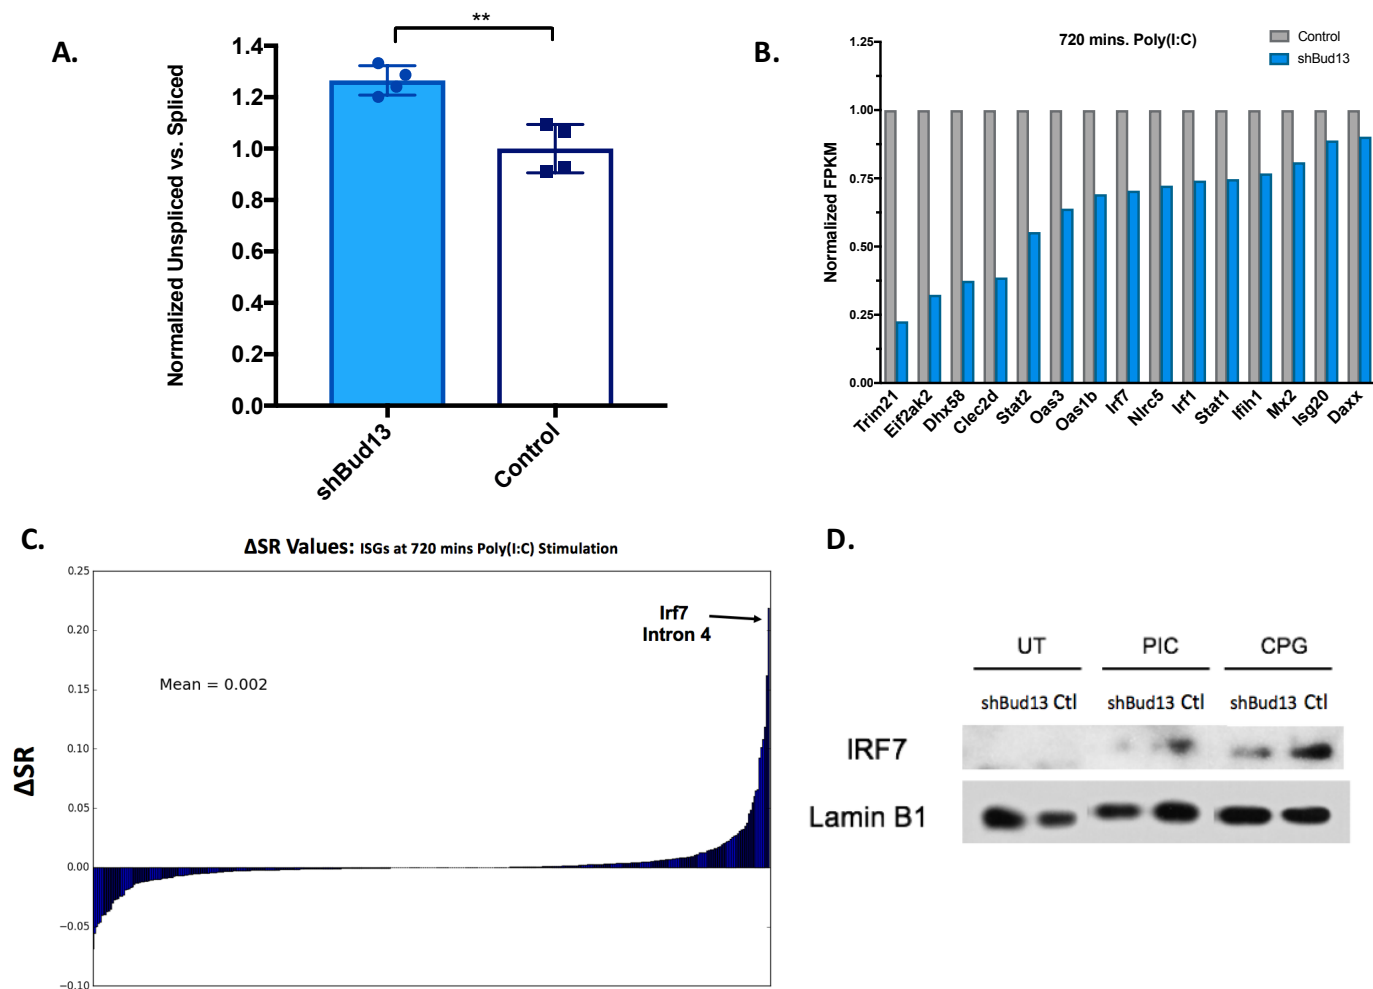

**Figure S3: Irf7 Intron 4 is the most Bud13 knockdown affected junction of all ISGs.**



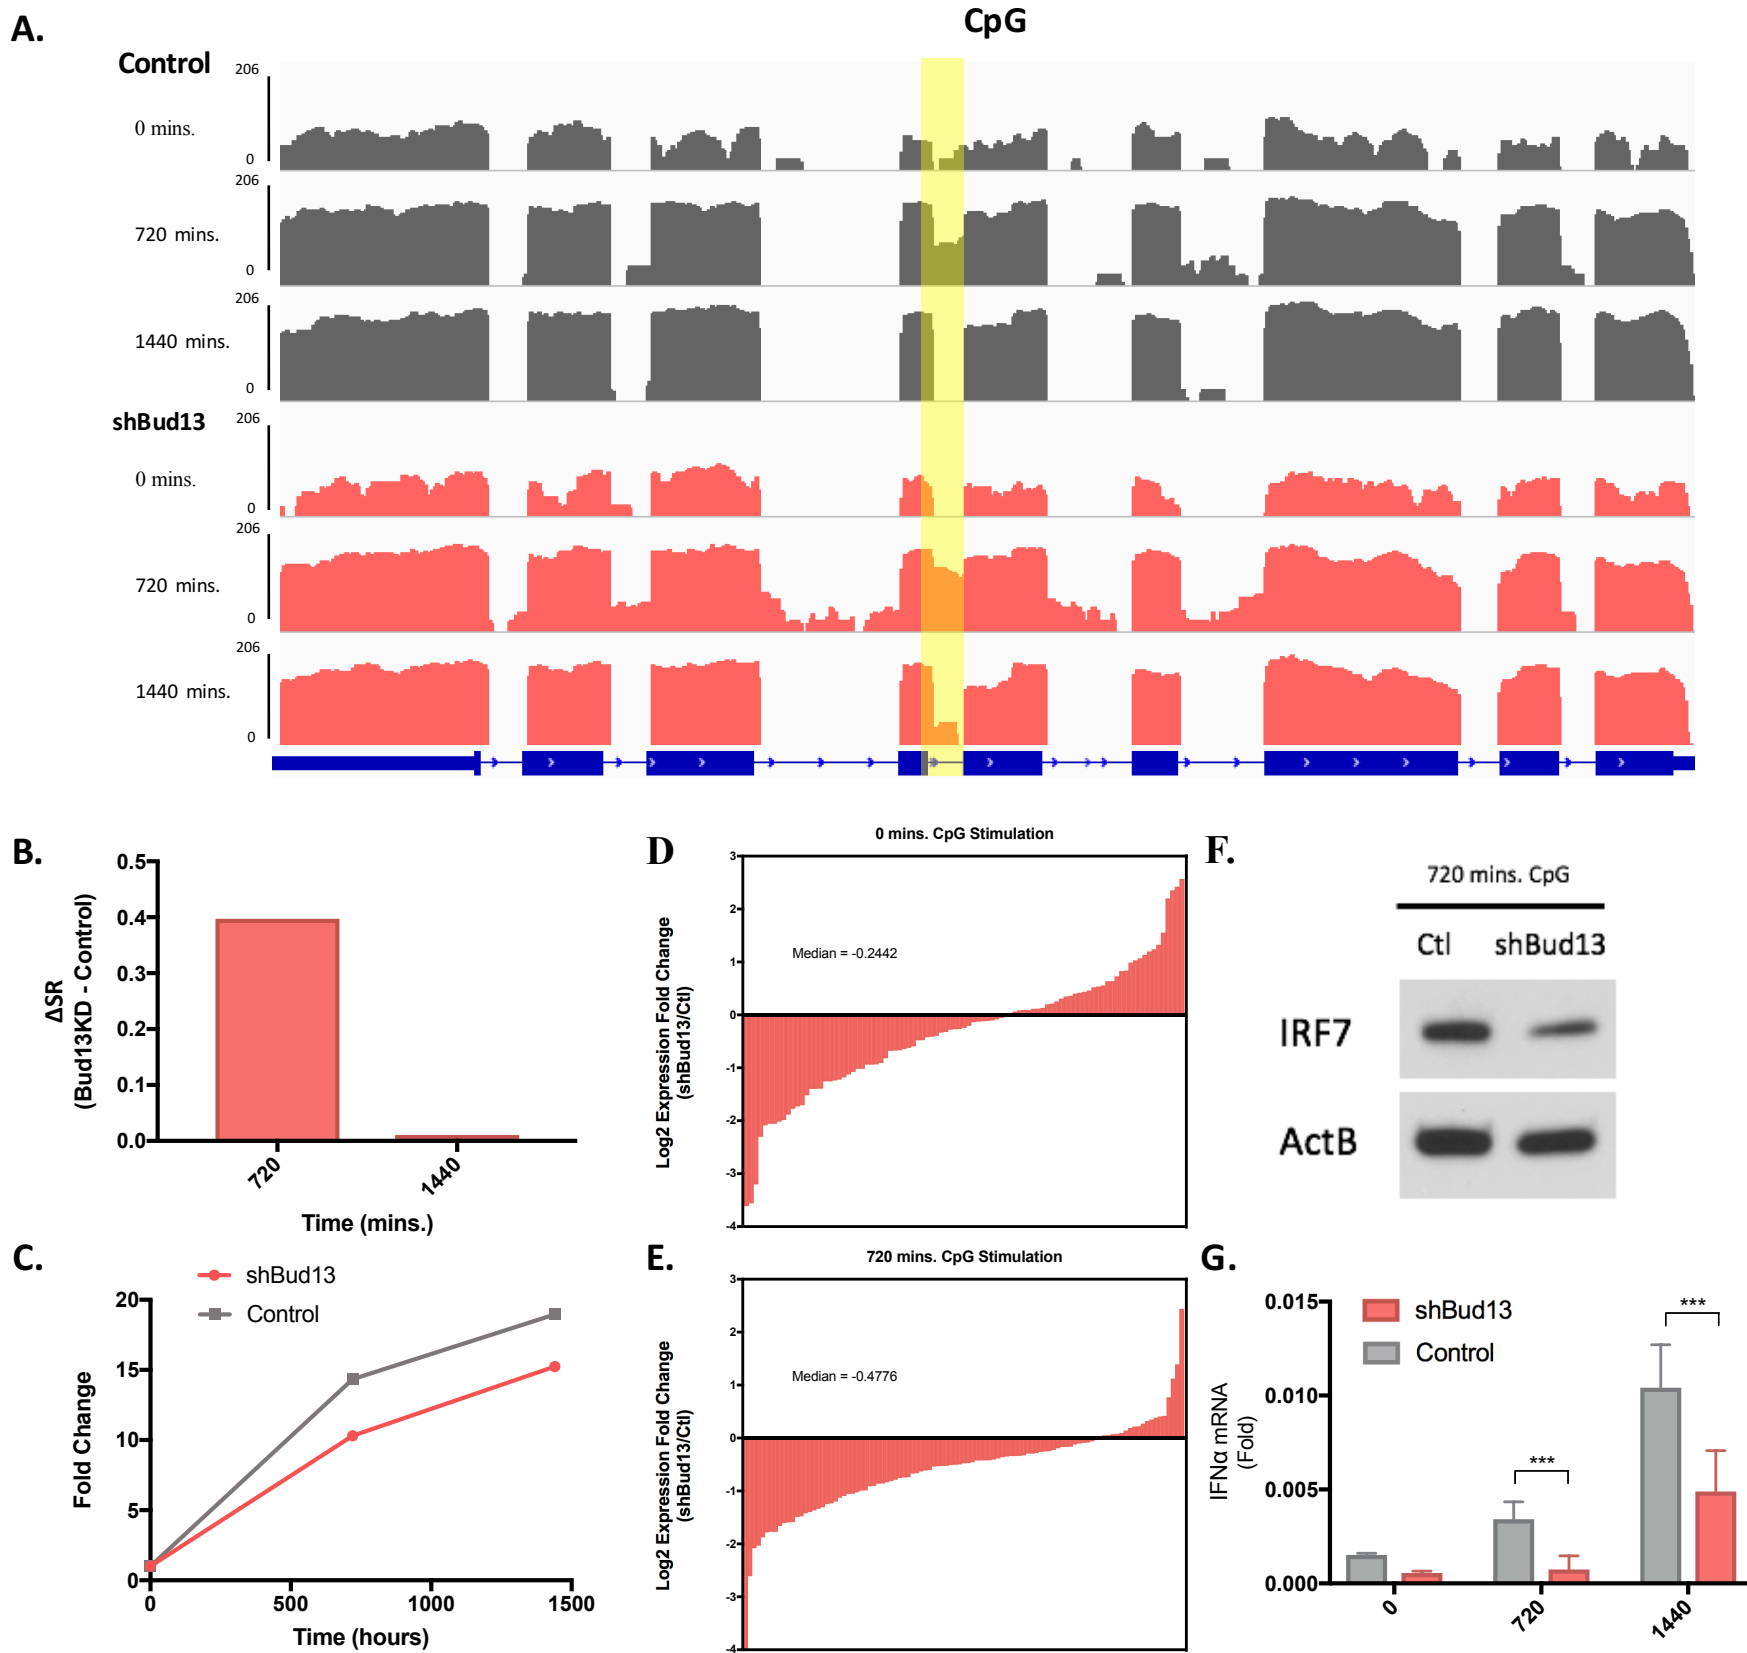

**Figure S4: Bud13 knockdown alters the type I interferon response in response to CpG**

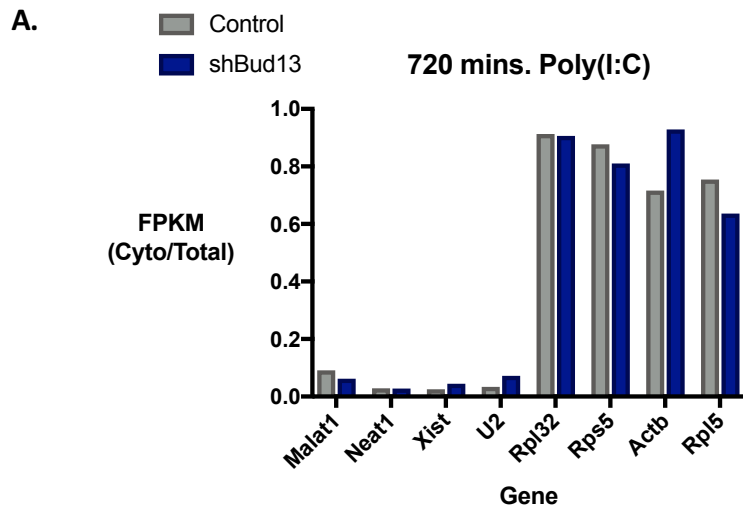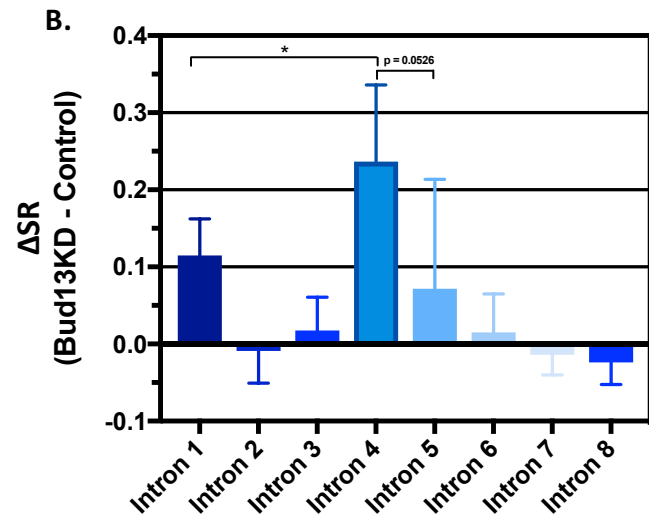

Figure S5: BMDM fractionation and effect of Bud13 on nuclear Irf7 splicing

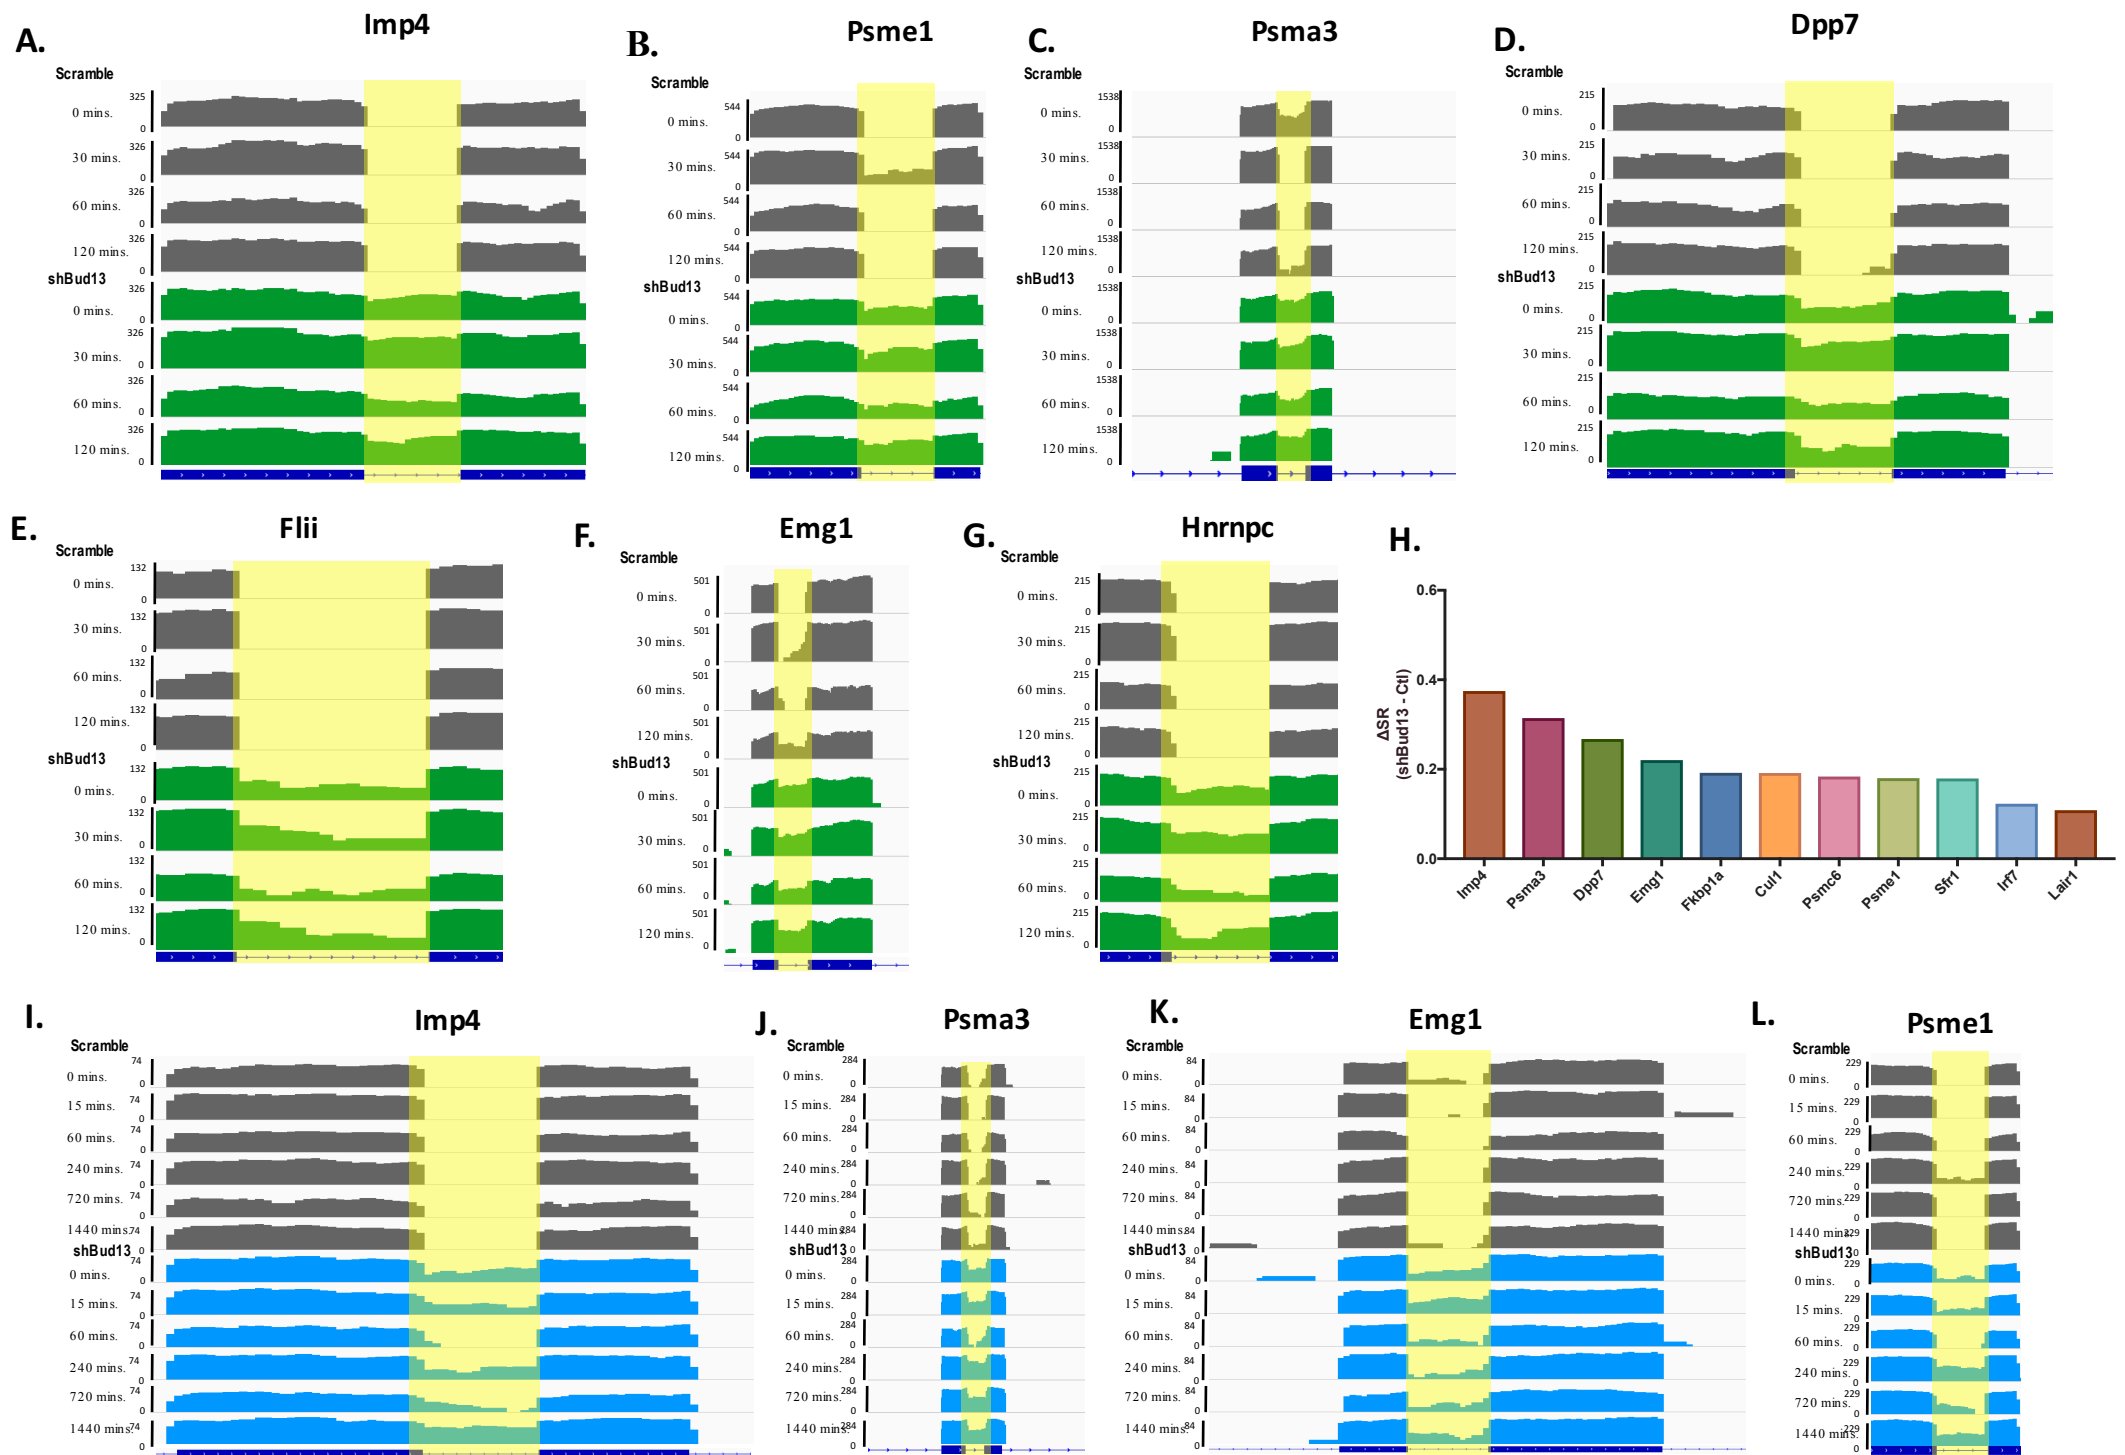

Figure S6: Histograms of mapped reads corresponding to hits identified in TNF $\alpha$  and PIC data-sets.

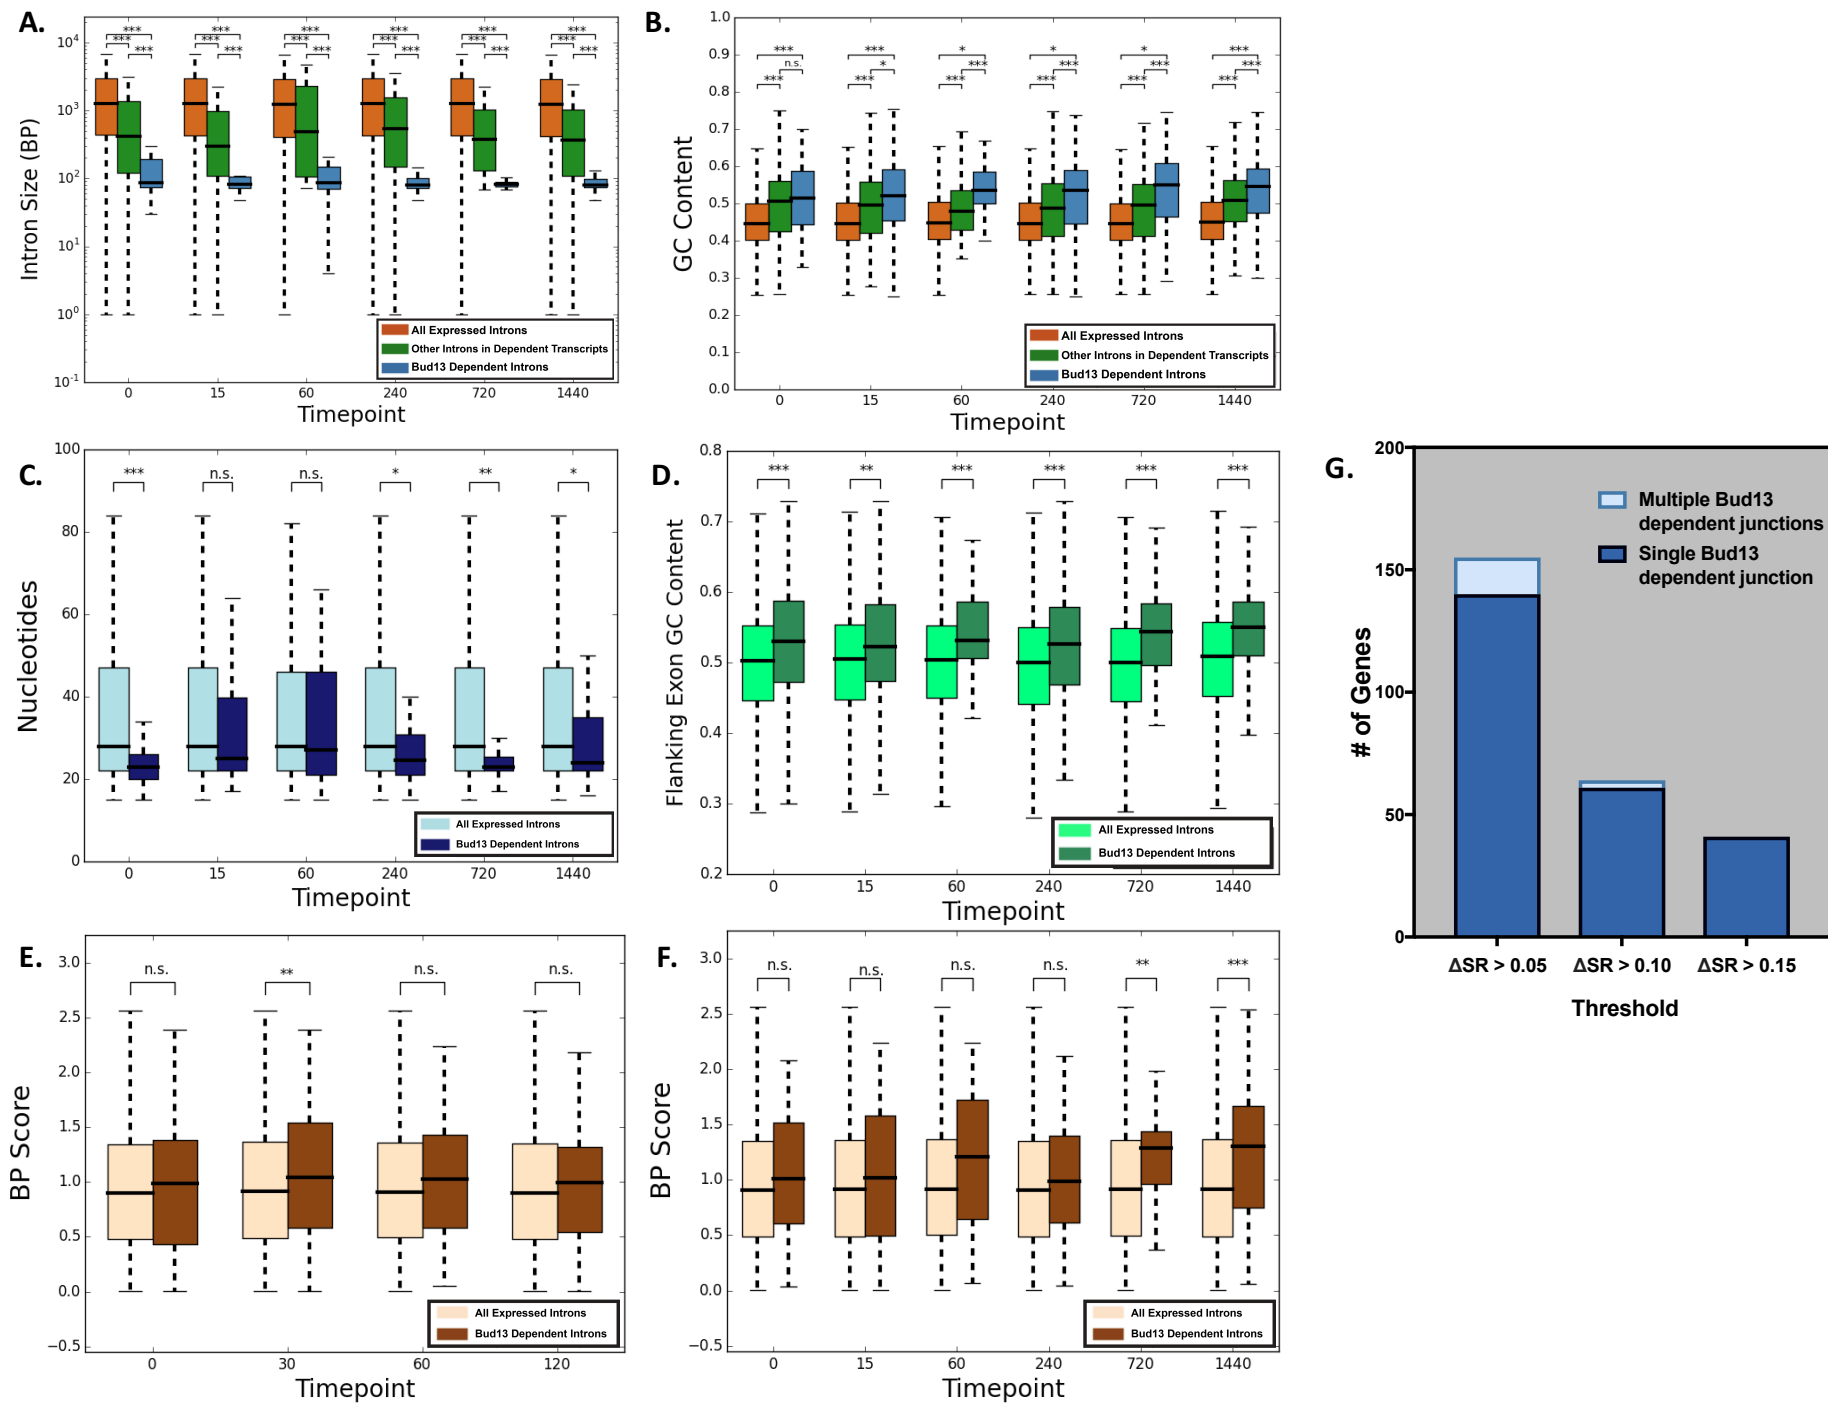

**Figure S7: Supplemental global analysis of shBud13**

A.

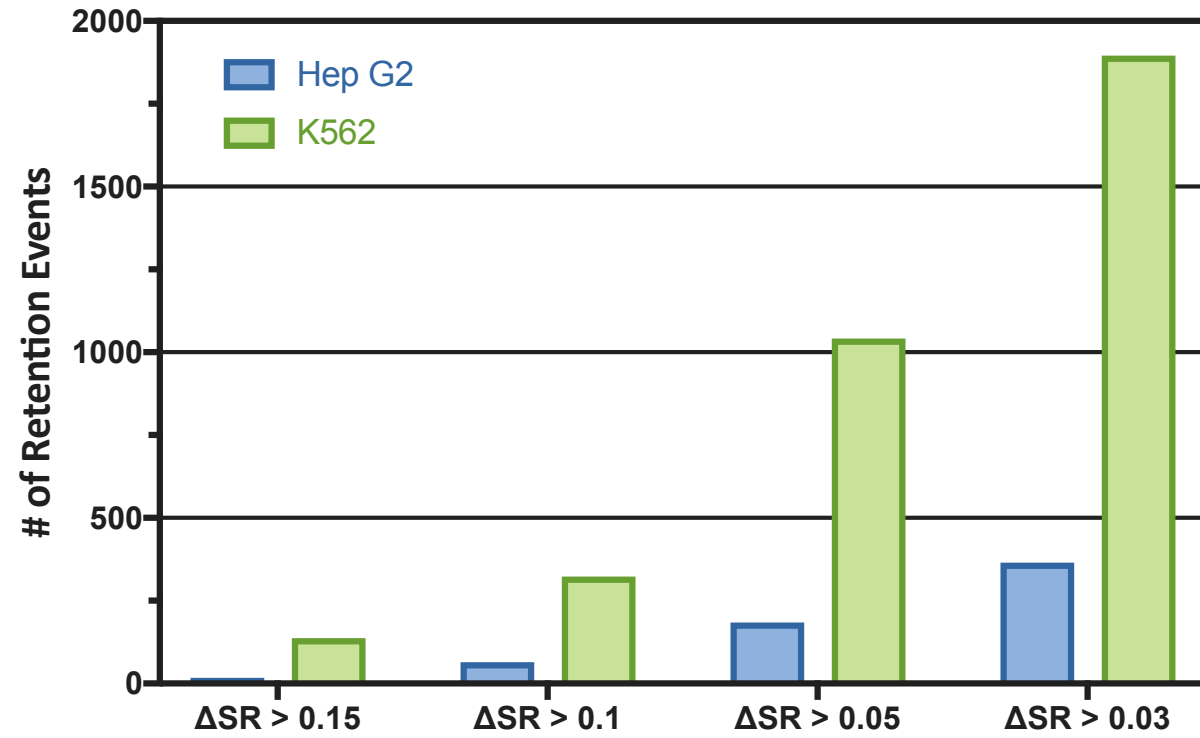

Figure S8: Bud13 dependent IR events in Hep G2 and K562 cells.

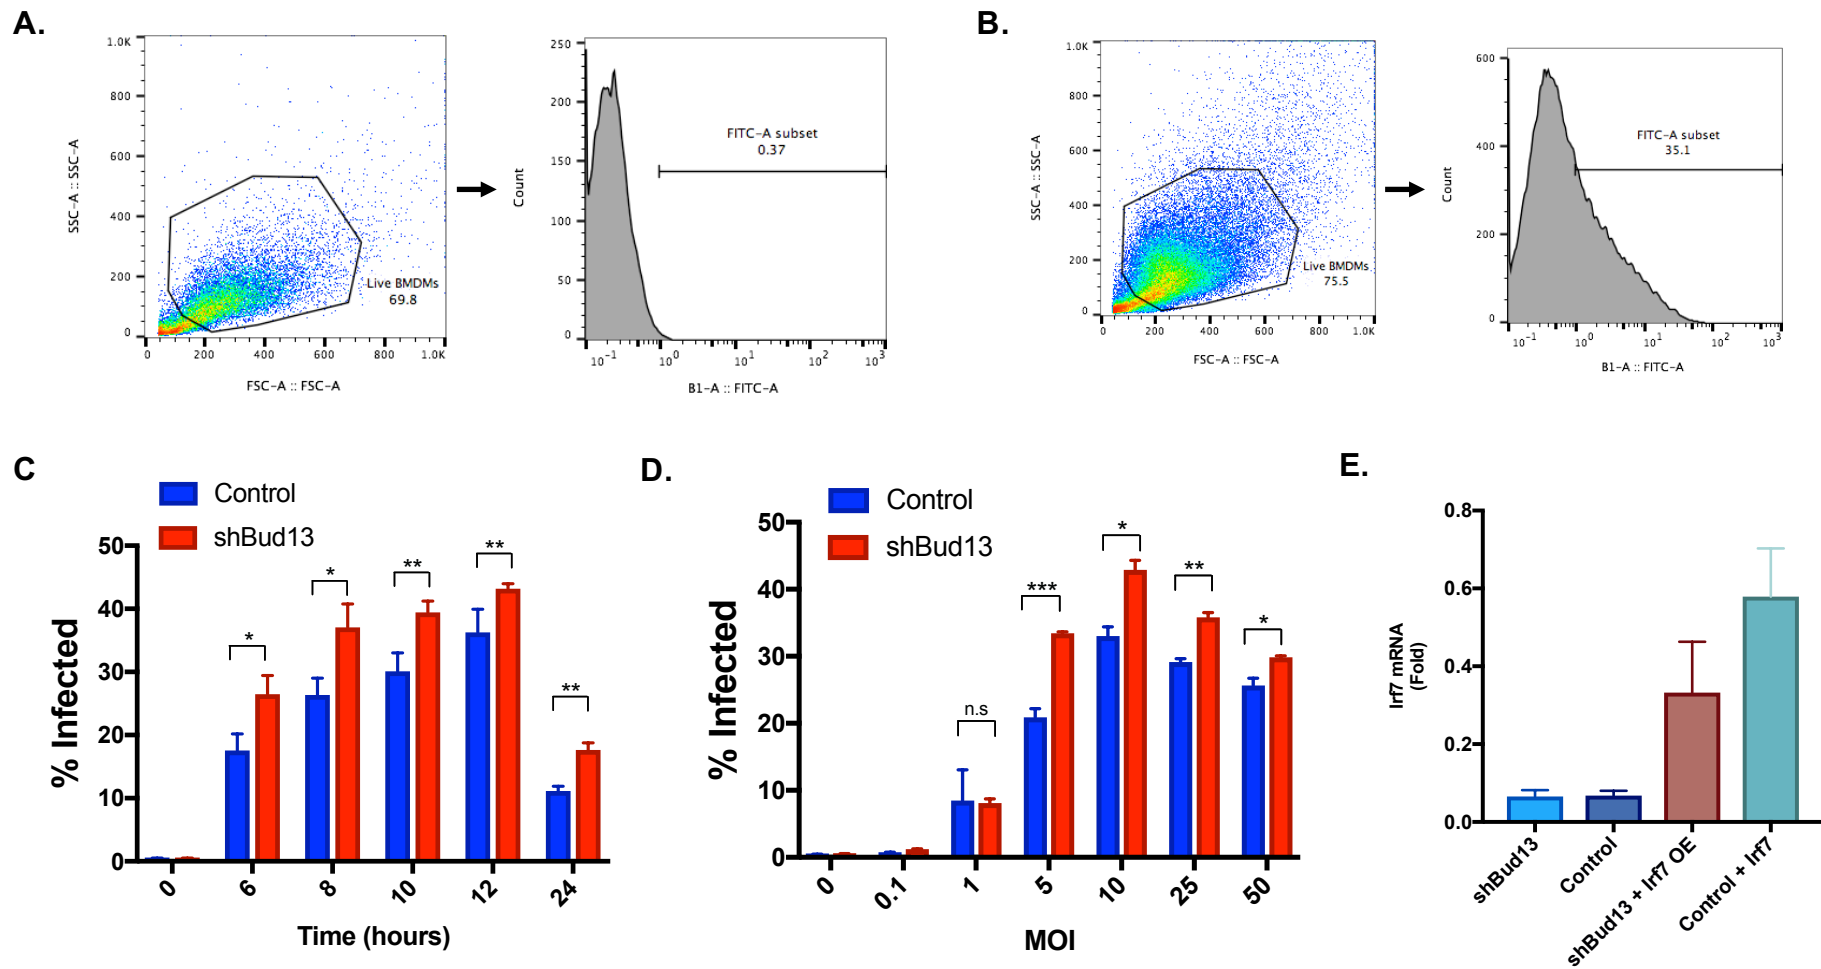

Figure S9: Bud13 knockdown alters the BMDM infection via VSV.

A.

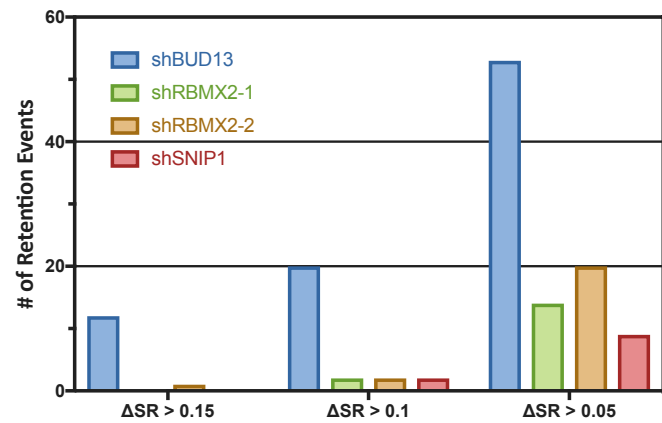

C.

B.

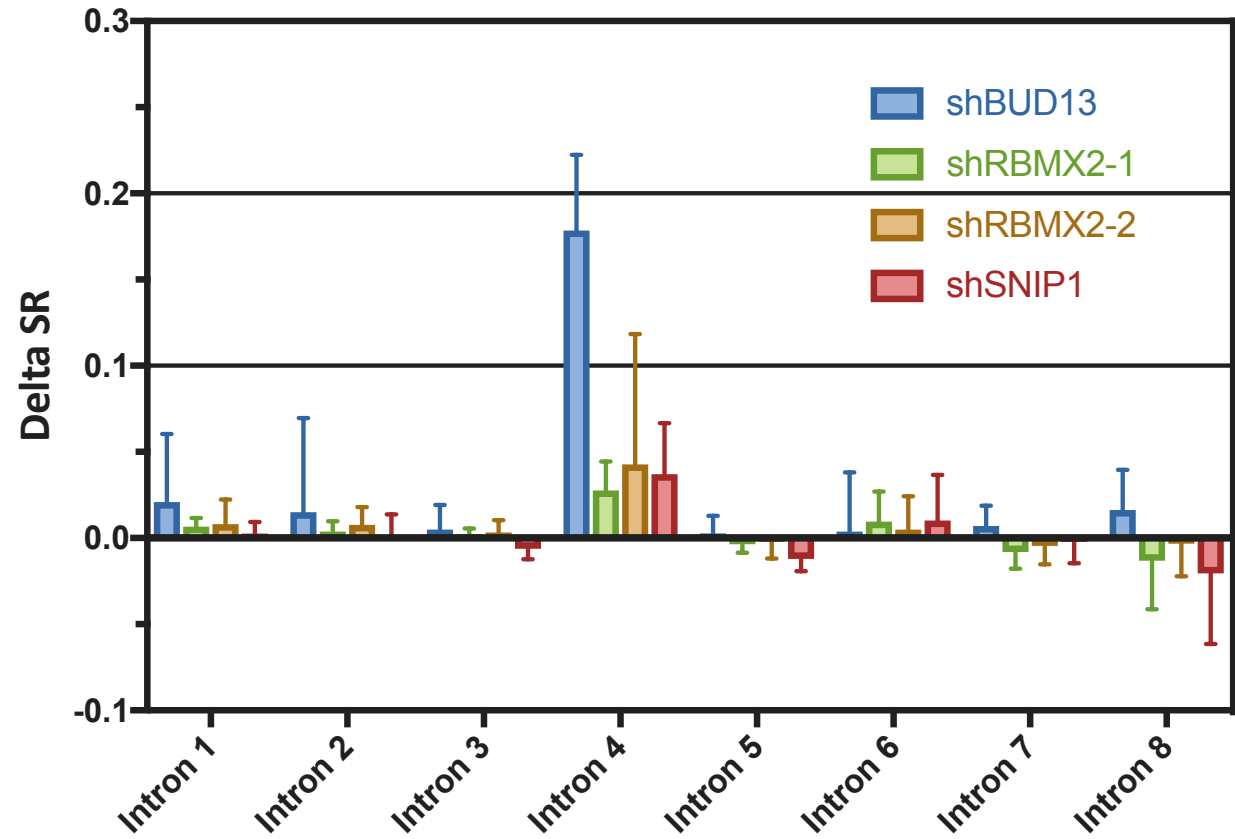

Figure S10: Knockdown of other RES complex proteins.
